## Evaluating brain structure traits as endophenotypes using polygenicity and discoverability

Nana Matoba<sup>1,2</sup>, Michael I. Love<sup>1,3</sup>, Jason L. Stein<sup>1,2</sup>

1. Department of Genetics, University of North Carolina at Chapel Hill, North Carolina, USA
2. UNC Neuroscience Center, University of North Carolina at Chapel Hill, North Carolina, USA
3. Department of Biostatistics, University of North Carolina at Chapel Hill, North Carolina, USA

### Correspondence

Jason L. Stein:

Address: 7202A Mary Ellen Jones Building, 116 Manning Drive, Chapel Hill, NC 27599

Phone: +1 (919) 843-5541

Email: [jason\\_stein@med.unc.edu](mailto:jason_stein@med.unc.edu)

### Keywords

Endophenotypes, cortical structure, genetic architecture, neuropsychiatric disorders

### Abstract

Human brain structure traits have been hypothesized to be broad endophenotypes for neuropsychiatric disorders, implying that brain structure traits are comparatively 'closer to the underlying biology'. Genome-wide association studies from large sample sizes allow for the comparison of common variant genetic architectures between traits to test the evidence supporting this claim. Endophenotypes, compared to neuropsychiatric disorders, are hypothesized to have less polygenicity, with greater effect size of each susceptible SNP, requiring smaller sample sizes to discover them. Here, we compare polygenicity and discoverability of brain structure traits, neuropsychiatric disorders, and other traits (89 in total) to directly test this hypothesis. We found reduced polygenicity (FDR = 0.01) and increased discoverability of cortical brain structure traits, as compared to neuropsychiatric disorders (FDR =  $3.68 \times 10^{-9}$ ). We predict that ~8M samples will be required to explain the full heritability of cortical surface area by genome-wide significant SNPs, whereas sample sizes over 20M will be required to explain the full heritability of major depressive disorder. In conclusion, we find reduced polygenicity and increased discoverability of cortical structure compared to neuropsychiatric disorders, which is consistent with brain structure satisfying the higher power criterion of endophenotypes.

## Introduction

Human brain structure traits have been posited to be broad endophenotypes for neuropsychiatric disorders [Almasy and Blangero, 2001; Bigos and Weinberger, 2010; Flint and Munafò, 2007; Meyer-Lindenberg and Weinberger, 2006]. Endophenotypes have two attractive properties for genetic search [Le and Stein, 2019]: First, *higher power*, because precisely measured endophenotypes are ‘closer to the underlying biology’ than heterogeneous, clinically defined disorders, smaller sample sizes are needed to detect endophenotype effects. Second, *mechanistic insight*, because those variants associated with an endophenotype also influence risk for neuropsychiatric disorders, endophenotype associations are informative about the mechanisms leading to risk for neuropsychiatric disorders. Genome-wide association studies (GWAS) have identified common genetic variants associated with many traits, including brain structure [Adams et al., 2016; Elliott et al., 2018; Grasby et al., 2020; Hibar et al., 2015; Hibar et al., 2017; Satizabal et al., 2019; Stein et al., 2012; Zhao et al., 2020] and risk for neuropsychiatric disorders [Demontis et al., 2019; Howard et al., 2019; Matoba et al., 2020; Pardiñas et al., 2018; Stahl et al., 2019]. GWAS results from large sample sizes allow for the comparison of common variant genetic architectures between traits [Watanabe et al., 2019] and the direct evaluation of these endophenotype properties.

Genetic architecture can be summarized by several parameters [Holland et al., 2020; Zhang et al., 2018]: (1) *heritability* ( $h^2$ ): the overall amount of trait variance explained by genetics, (2) *polygenicity* ( $\pi_c$ ): the proportion of susceptibility SNPs (sSNPs), LD-independent loci associated with a trait that are not necessarily genome-wide significant, relative to the total number of LD-independent SNPs in the genome ( $M$ ) and (3) *discoverability* ( $\sigma$ ): the distribution of effect sizes of sSNPs on a trait. Higher polygenicity of a trait indicates more sSNPs that are associated with that trait (**Figure 1**). Higher polygenicity is generally associated with lower effect size of each sSNP, requiring higher sample sizes to discover them [Watanabe et al., 2019]. Endophenotypes, compared to neuropsychiatric disorders, are hypothesized to have less polygenicity, with greater effect size of each sSNP, requiring lower sample sizes to discover them.

Here, we directly tested whether brain structure traits satisfy the higher power property of endophenotypes using summary statistics from existing GWAS. We applied GENESIS [Zhang et al., 2018], a mixture model algorithm that clusters LD independent SNPs into either null SNPs, those that have no detectable effect on a trait, or sSNPs, those that have a detectable influence without requiring genome-wide significance. We found reduced polygenicity and increased discoverability of cortical surface area traits as compared to both cortical thickness and subcortical volumes. Additionally, we found reduced polygenicity and increased discoverability of cortical brain structure traits, as compared to neuropsychiatric disorders and anthropometric traits. We therefore project that, as additional GWAS are completed in the future, studies will find more explained heritability of cortical structure traits compared to equivalently-sized studies of neuropsychiatric disorders. These findings support cortical brain structure traits as satisfying the higher power criteria of an endophenotype.

## Methods

### GWAS summary statistics

We obtained GWAS summary statistics for 89 complex traits and disorders. Summary statistics for brain structure traits including cortical surface area ( $n = 35$ ), thickness ( $n = 35$ ) [Grasby et al., 2020] and subcortical volumes ( $n = 7$ ) [Hibar et al., 2017; Satizabal et al., 2019] were obtained from the Enhancing NeuroImaging Genetics through Meta Analysis (ENIGMA) consortium (<http://enigma.ini.usc.edu/research/download-enigma-gwas-results/>). From the Psychiatric Genomics Consortium (PGC) (<https://www.med.unc.edu/pgc/download-results/>), summary statistics for three psychiatric disorders (schizophrenia [Ripke et al., 2013; Schizophrenia Working Group of the Psychiatric Genomics Consortium, 2014], bipolar disorder [Stahl et al., 2019], depression [Howard et al., 2019; Wray et al., 2018] (including major depression (MDD) and broad depression, excluding 23andMe participants)) were obtained. We additionally downloaded summary statistics for schizophrenia [Pardiñas et al., 2018] from <https://walters.psychm.cf.ac.uk/>. Summary statistics for Attention deficit/hyperactivity disorder (ADHD) (European population) [Demontis et al., 2019] were obtained from the Integrative Psychiatric Research (iPSYCH) website (<https://ipsych.dk/en/research/downloads/>). Summary statistics for Autism Spectrum Disorder (ASD) were generated in our previous study [Matoba et al., 2020]. Summary statistics for addiction (cigarettes per day and drinks per week) [Liu et al., 2019] were downloaded from the GWAS & Sequencing Consortium of Alcohol and Nicotine use

(GSCAN) (<https://conservancy.umn.edu/handle/11299/201564>). Summary statistics for cognitive function (intelligence [Savage et al., 2018] and reaction time [Watanabe et al., 2019]) were obtained from [https://ctg.cncr.nl/software/summary\\_statistics](https://ctg.cncr.nl/software/summary_statistics) and [https://atlas.ctglab.nl/ukb2\\_sumstats/f.20023.0.0\\_res.EUR.sumstats.MACfilt.txt.gz](https://atlas.ctglab.nl/ukb2_sumstats/f.20023.0.0_res.EUR.sumstats.MACfilt.txt.gz), respectively. Summary statistics for anthropometric measurements (height and BMI) [Yengo et al., 2018] were obtained from the Genetic Investigation of ANthropometric Traits (GIANT) consortium ([https://portals.broadinstitute.org/collaboration/giant/index.php/GIANT\\_consortium\\_data\\_files#BMI\\_and\\_Height\\_GIANT\\_and\\_UK\\_BioBank\\_Meta-analysis\\_Summary\\_Statistics](https://portals.broadinstitute.org/collaboration/giant/index.php/GIANT_consortium_data_files#BMI_and_Height_GIANT_and_UK_BioBank_Meta-analysis_Summary_Statistics))

Further information is summarized in **Supplementary Table 1**.

## Data preparation for GENESIS

The proportion of sSNPs for 89 traits and diseases and their effect size distributions were estimated using GENetic Effect-size distribution Inference from Summary-level data (GENESIS; v1.0) (<https://github.com/yandorazhang/GENESIS>) [Zhang et al., 2018]. GENESIS is a tool that distinguishes sSNPs from null SNPs using a mixture model of effect sizes from GWAS summary statistics in order to estimate parameters describing the genetic architecture of a trait. As the software requires rsID, Z score, and effective sample size of GWAS study as inputs, we calculated Z scores using effect sizes (beta or log(OR)) and standard errors (se). If the downloaded summary statistics did not provide the sample numbers for individual SNPs, we used the total number of enrolled participants (# of cases and controls for case-control studies). For case-control studies, effective sample sizes were further estimated by  $4/(1/\text{cases} + 1/\text{controls})$  [Willer et al., 2010]. Using the SNP QC function (*preprocessing*) implemented in GENESIS, SNPs with a low effective sample size ( $< 0.67 * 90^{\text{th}}$  percentile of sample size), or very large effect size ( $Z^2 > 80$ ) were removed. This function also removed SNPs within the major histocompatibility complex (MHC) region. Only those SNPs in HapMap3 [The International HapMap 3 Consortium, 2010] with  $\text{MAF} \geq 0.05$  in European population from the 1000 Genome project Phase 3 (1KG) [The 1000 Genomes Project Consortium, 2015] were retained. We used pre-computed LD-scores, which were also estimated from common SNPs in HapMap 3 using LD from 1KG European population as described in the original GENESIS paper [Zhang et al., 2018].

## Model selection

We ran the *genesis()* function with default options (LDcutoff ( $r^2$ ) = 0.1, LDwindow = 1 Mb, M = 1,070,777 total number of reference SNPs). GENESIS implements two models (the two-component model, M2; and the three-component model, M3), which assumes that the distribution of effects for non-null SNPs follows either a single normal distribution or mixture of two normal distributions (allowing two distinct sSNP groups based on effect size). Variance parameters for the M3 model were estimated using output from the M2 model as recommended in the GENESIS documentation. To select the best fit model, we used the modified Bayesian information criterion (BIC), also implemented in GENESIS [Zhang et al., 2018] as well as the ratio of variance estimates from the M3 model. We used M2 if the ratio of two variance estimates ( $\sigma^2_1/\sigma^2_2$ ) from M3 was less than 5 or if the BIC for M2 was less than M3. (**Supplementary Figure 1-5, Supplementary Table 2**). QQ plots were generated to evaluate goodness of model fit by comparing p-values from the GWAS summary statistics with the fit model estimates. Expected p-values from the fit models and 80% confidence intervals were internally generated in *genesis()*.

## Estimation of polygenicity and effect-size distributions

After selecting the best model, we then estimated the parameters of genetic architecture: polygenicity and discoverability. The mixture model provides the proportion of non-null SNPs (sSNPs) for each trait, which is the polygenicity ( $\pi_c$ ). The total number of sSNPs was estimated by

$$\pi_c \times M \quad \dots(1)$$

where  $\pi_c$  is the proportion of sSNPs obtained by *genesis()* and M is the number of SNPs in the reference panel (M = 1,070,777). And the number of sSNPs in the cluster with larger variance component for M3 was estimated by multiplying the proportion of sSNPs in that cluster (**Supplementary Table 3**). 95% CIs for number of sSNPs were also calculated by adding and subtracting 1.96 times the standard error for  $\pi_c$  and plugging in these interval endpoints into formula (1). We note the standard error of  $\pi_c$  for cuneus thickness was not able to be estimated by *genesis*, so we could not estimate the 95% CI of  $\pi_c$  and number of sSNPs for this trait.

In order to compare effect size distributions across traits (discoverability), regardless of whether the traits were modeled with M2 or M3, we selected one quantity from the distribution: the 50th percentile of ranked sSNPs absolute effect size. In other words, the predicted effect size of an sSNP where half of all sSNPs have larger effect size in absolute value. In order to estimate this

quantity, we used the distribution and quantile functions in R-3.5.0. For phenotypes with M2, we used

$$\text{qnorm}(0.25, \text{sd} = \sqrt{\sigma^2}, \text{lower.tail}=\text{F}) \quad \dots(2)$$

where  $\sigma^2$  is variance estimated by GENESIS

For phenotypes with M3, we found the smallest value "x" via grid search such that

$$2 * (\text{prop} * \text{pnorm}(x, \text{sd}=\sqrt{\sigma_1^2}, \text{lower.tail}=\text{F}) + (1-\text{prop}) * \text{pnorm}(x, \text{sd}=\sqrt{\sigma_2^2}, \text{lower.tail}=\text{F})) < 0.5 \quad \dots(3)$$

where prop is the proportion of sSNPs in cluster 1 with larger effect sizes,  $\sigma_1^2$  is the variance in cluster 1,  $\sigma_2^2$  is variance in cluster 2 with smaller effect sizes, and  $s = \text{seq}(0, 0.02, \text{length}=200)$ .

95% confidence intervals (CI) for each parameter were calculated by adding and subtracting 1.96 times the standard error for each parameter ( $\sigma_1^2$ ,  $\sigma_2^2$ , prop) output from GENESIS, and plugging in these interval endpoints into the formula above ((2) or (3) based on best fit model).

For some traits, the range of CIs were outside possible values, so we limited them as follows: (1) if the lower bound of  $\sigma_1^2$  or  $\sigma_2^2$  was  $< 0$ , we set its value to 0, (2) if the lower bound of proportion of sSNPs in cluster 1 was  $< 0$ , we set its value to 0 (meaning that the sSNPs were considered to belong to cluster 2) and (3) if the upper bound of prop was  $> 1$ , we set its value to 1.

## Prediction of sample sizes needed to attain complete heritability

We estimated the predicted heritability explained by genome-wide significance (GWS) SNPs (GVpercentage) with a given sample size from 50,000 to 200,000,000 (interval = 50,000) by applying the *projection()* function in GENESIS. We defined the sample size needed to achieve complete heritability as the sample size required for the GVpercentage to pass 99%. We computed this prediction with the best fit model for each phenotype. If the GVpercentage did not pass 99% at a sample size of 200,000,000, we showed the GVpercentage achieved at that sample size.

## Comparison of estimates across categories

The implementation of GENESIS does not have functions that directly compare the polygenicity or discoverability across traits or groups of traits. In order to compare these values across traits, it is necessary to take into account the standard error of each parameter estimate. After standard errors were calculated, the heterogeneity ( $F^2$  statistic) between groups of traits was

calculated based on a fixed effect model implemented in *metagen()* function in Meta package (v4.12-0) [Schwarzer et al., 2015], and specifying the argument *byvar=group*. Because the standard error of  $\pi_c$  for cuneus thickness was not able to be estimated by GENESIS (see above in estimation of polygenicity and effect-size distributions section), we excluded cuneus thickness and cuneus surface area to avoid potential biases in comparisons (**Figure 2**). The FDR-adjusted p-values [Benjamini and Hochberg, 1995] (FDR < 0.05) of heterogeneity across six pairs of trait groups was used to determine the significance. The outputs from *metagen* were further used to generate a forest plot.

## Results

We first obtained GWAS summary statistics of various traits including cortical and subcortical brain structure [Grasby et al., 2020; Hibar et al., 2017; Satizabal et al., 2019]), neuropsychiatric disorders and cognitive phenotypes [Demontis et al., 2019; Howard et al., 2019; Liu et al., 2019; Matoba et al., 2020; Pardiñas et al., 2018; Ripke et al., 2013; Savage et al., 2018; Schizophrenia Working Group of the Psychiatric Genomics Consortium, 2014; Stahl et al., 2019; Watanabe et al., 2019; Wray et al., 2018], and anthropometric measurements [Yengo et al., 2018] (**Supplementary Table 1**). All of the GWASs were performed in European ancestries. Effective sample size ranged from 29,235 individuals for brain stem volume to 795,640 individuals for body mass index (BMI). In order to quantify parameters of genetic architecture for each of these traits, we applied GENetic Effect-size distribution Inference from Summary-level data (GENESIS) [Zhang et al., 2018] to those GWAS summary statistics (**Supplementary Table 1**). Using GENESIS, for each trait, we estimated several parameters describing the genetic architecture of the traits: (1) polygenicity ( $\pi_c$ ) and the total number of sSNPs as ( $\pi_c \times M$ ), (2) discoverability quantified as the variance of effect sizes for non-null sSNPs ( $\sigma_1^2$  and  $\sigma_2^2$ ), and (3) predictions of heritability explained by genome-wide significance ( $P < 5.0 \times 10^{-8}$ ; GWS) sSNPs in future sample sizes. We then compared these genetic architecture parameters across traits.

## Model Selection

We first identified the best fit model comprising either one set of null SNPs and one set of sSNPs (M2) or one set of null SNPs and two sets of sSNPs at different levels of effect size (M3) for each trait (**Supplementary Table 2, 3**). Among 89 traits, the M3 model best fit 39 traits

(44.9%). The thickness and surface area of the brain cortex ( $n = 35$  traits each) showed somewhat different proportions of the best fit model (i.e. 65.7% of surface area GWAS best fit M2, while 60.0% of thickness GWAS best fit M3), though this difference was not significant (Fisher's exact test;  $p = 0.055$ ) (**Supplementary Figure 1, 2, Supplementary Table 2**). To evaluate goodness of model fit to the observed data, we generated Q-Q plots which allows visual assessment of whether the expected p-values from the model correspond to the empirically observed p-values from GWAS summary statistics (**Supplementary Figure 1-5**). Generally, we observed strong goodness of fit for the best fit model, where the observed p-values corresponded to the model p-values. However, for some traits fit to the M3 model (e.g. surface area of lateral orbitofrontal area and thickness of caudal middle frontal area), there are a number of outlier sSNPs ( $P < 10^{-10}$ ) implying that these traits could be fit to more complex models [Zhang et al., 2018].

## Comparing polygenicity across complex brain-relevant traits

We compared the number of susceptibility SNPs (sSNPs), a measure of polygenicity, between groups of related traits. We found that global surface area had  $\pi_c = 0.9\%$  with 9,949 sSNPs (95% CIs: 6,552 to 13,346) (**Figure 2a**). Current GWAS results have detected only 20 genome-wide significant loci [Grasby et al., 2020], but these results show that many more significant loci are expected to be associated with global surface area as sample sizes grow. We noted that there was heterogeneity in terms of polygenicity across different cortical regions with insula having the highest polygenicity (10,791 sSNPs, 95% CIs 7,510 to 14,072) and parahippocampal gyrus having the least polygenicity (2,365 sSNPs, 95% CIs 0 to 5,989). There was significant heterogeneity observed across the 35 cortical surface area traits, indicating regional genetic architecture varies even for the same measure (surface area) across cortical regions ( $R^2 = 67\%$ ;  $p < 0.01$ ). We then compared polygenicity from the 34 cortical surface area traits to the 34 matched cortical thickness traits (excluding cuneus, see Methods). The predicted number of sSNPs for cortical surface area was significantly smaller than cortical thickness (FDR = 0.01; **Figure 2a, c**), indicating that cortical surface area has reduced polygenicity as compared to thickness. Similarly, subcortical volumes also have reduced polygenicity relative to cortical surface area, indicating that cortical surface area traits, as a group, are the least polygenic among these tested brain structure traits.

Next, we tested differences in polygenicity for global cortical structure traits (global thickness and surface area) compared to brain-relevant and anthropometric traits. Consistent with



previous findings [Zhang et al., 2018], these neuropsychiatric disorders, addiction relevant traits, cognition, and anthropometric traits all had high levels of polygenicity (**Figure 2b**). Interestingly, we found significantly reduced polygenicity for cortical structure traits as compared to neuropsychiatric disorders (FDR = 0.007), addiction relevant traits (FDR = 0.0007), cognition (FDR = 0.0007) and anthropometric measurements (FDR = 0.0007) (**Figure 2b-c**). Overall these results are consistent with predictions of cortical structure as satisfying the higher power criterion of an endophenotype.

## Comparing discoverability across complex brain-relevant traits

We next examined the effect size distribution across the same traits. In **Figure 3a**, we plotted the estimated effect size distribution of global cortical structure phenotypes, neuropsychiatric disorders, cognition, addiction relevant traits, and brain relevant traits using the best fit model. As expected based on the polygenicity results, we observed increased discoverability, wider effect size distribution and larger value of the  $\sigma$  parameter(s), of cortical structure traits as compared to others. However, this visual comparison does not include confidence intervals of discoverability estimates, limiting statistical inference across traits. To identify one quantity from the effect size distribution, including confidence intervals, that can be compared across traits potentially modeled with different mixture distributions, we used the absolute value of the effect size of the 50th percentile of ranked sSNPs (**Figure 3b**). Consistent with the polygenicity results above, we observed increased discoverability of effect sizes in cortical surface area compared to cortical thickness (FDR =  $5.66 \times 10^{-5}$ ). However, we did not observe statistically different effect sizes in cortical surface area compared to subcortical volumes (FDR = 0.05) (**Figure 3d**, **Supplementary Figure 6**).

We also statistically compared the effect size distribution of genetic variants across brain-relevant traits including neuropsychiatric disorders, addiction related traits, cognitive function, and anthropometric measurements (**Figure 3c, d**). The heterogeneity tests indicated significantly increased effect sizes in cortical structure compared to those complex traits (vs neuropsychiatric disorders: FDR =  $3.68 \times 10^{-9}$ ; addiction relevant traits: FDR =  $4.03 \times 10^{-18}$ ; cognition: FDR =  $9.88 \times 10^{-12}$ ; anthropometric measurements: FDR =  $9.80 \times 10^{-4}$ ). There was also heterogeneity within each category, and the difference in observed significance between cortical structure and neuropsychiatric disorders came mainly from depression, insofar as the significance decreased when removing depression from the group of traits (FDR w/o depression

= 0.33) (**Figure 3c, d**). In summary, we found evidence that sSNPs for brain structure have stronger effect size compared to neuropsychiatric disorders, largely driven by the low effect sizes observed in depression. We also observed that brain structure traits have stronger effect sizes when compared to cognition or addiction relevant traits.

### Correlation between polygenicity, discoverability and heritability

Previous studies have shown that increasing polygenicity is associated with decreased discoverability [Watanabe et al., 2019]. To test if this same relationship was observed among the traits tested here, we correlated these measures. We observed an inverse relationship between estimated polygenicity and estimated discoverability (Pearson's correlation coefficient ( $r$ ) = -0.65,  $p$  =  $4.43 \times 10^{-7}$ ; **Supplementary Figure 8a**), though such a large negative correlation between polygenicity and discoverability was expected given the covariance of estimated parameters output by GENESIS (**Supplementary Figure 8b**). Moreover, discoverability was also correlated to heritability of brain-related phenotypes ( $r$  = 0.56,  $p$  =  $1.57 \times 10^{-8}$ ; **Supplementary Figure 8c**). Interestingly, we found no evidence that polygenicity and heritability are correlated ( $r$  = 0.067,  $p$  = 0.53; **Supplementary Figure 8c**) indicating that heritability might be independent of polygenicity but be affected by the magnitude of effect size of sSNPs.

### Sample sizes needed to explain full heritability

Next, we predicted the number of subjects needed in future GWAS to identify all of the common variant loci (sSNPs) associated with a trait. In other words, we estimated the sample size needed to achieve 99% heritability explained by genome-wide significant SNPs. (**Figure 4, Supplementary Table 4**). We predict that at least 8 million individuals will be required to explain the full heritability of global cortical surface area and 8.65 million for cortical thickness. Notably, while less than 20 million individuals will be needed to explain the full heritability for the majority of regional surface area traits, about half of regional cortical thickness will not achieve full heritability even at that large sample size. As expected, larger sample sizes will be needed to explain the full heritability for phenotypes that showed lower discoverability or increased polygenicity such as depression or drinks per day.

## Discussion

Here, we directly tested one proposed property of brain structure traits as endophenotypes: higher power of genetic discovery. We evaluated this by estimating the polygenicity and discoverability (effect size distribution) across multiple cortical and subcortical brain structure traits and compared these to the same measures from neuropsychiatric disorders, cognitive, addiction relevant, and brain related traits. We found that cortical structure traits have reduced polygenicity and increased discoverability compared to neuropsychiatric disorders. This is consistent with brain structure satisfying the higher power criterion of endophenotypes.

Our results have both practical and theoretical implications. Practically, brain structure traits have higher power than neuropsychiatric disorders so smaller sample sizes will be required to achieve equivalent gains in genetic discovery. The costs of phenotype acquisition for brain MRI are still high, but nevertheless large biobanks and integration of genotype data with electronic medical records are now developing that will allow GWAS of brain structure in sample sizes of hundreds of thousands in the near future [Bowton et al., 2014; Elliott et al., 2018]. Theoretically, we hypothesize that polygenicity and discoverability are related to the number of causal mechanisms that impact a trait. For example, genetic variants associated with molecular traits like chromatin accessibility have very high effect sizes and low polygenicity [Liang et al., 2020] - a single variant may explain most of the heritability of an accessible region. This is likely because there are a limited number of mechanisms by which genetic variation influences accessibility, namely the ability of DNA binding proteins (like transcription factors) to bind to the genome. Genetic variants associated with gene expression also have high effect sizes, but lower than caQTLs [Liang et al., 2020]. This is likely because multiple mechanisms can influence gene expression including transcription factor binding, miRNA expression levels, methylation, and RNA degradation [Li et al., 2016]. Extending this logic to complex traits like brain structure, we would predict that fewer mechanisms influence cortical surface area compared to neuropsychiatric disorders. For example, we previously have described evidence to support that cortical surface area is influenced by proliferation of neural progenitor cells present in fetal development [Grasby et al., 2020; de la Torre-Ubieta et al., 2018]. Whereas, for depressive disorder, which has some shared genetic basis with cortical surface area, we would hypothesize that multiple mechanisms including multiple cell-types (progenitors and mature neurons), multiple cellular processes (proliferation and neuronal firing), in multiple developmental and tissue contexts all create risk for the complicated disorder.

We note that our study was only designed to address the first criterion of an endophenotype, higher power. In order to gain mechanistic insight into the basis of neuropsychiatric disorders using brain structural traits, there must also be both a genetic correlation and evidence of mediation between the brain structural trait and risk for a neuropsychiatric disorder [Kendler and Neale, 2010; Le and Stein, 2019]. Significant genetic correlations have been demonstrated between ADHD, major depressive disorder, and brain structure traits [Grasby et al., 2020; Klein et al., 2019; Satizabal et al., 2019]. Notably though, no significant genetic correlations have yet been observed between brain structural traits and schizophrenia [Franke et al., 2016; Grasby et al., 2020], so it is unlikely that the brain structural traits explored in this study will provide mechanistic insight into the basis of schizophrenia.

We should interpret our results in light of some limitations. First, earlier studies have shown that estimates of effect sizes are likely to be biased upwards in smaller sample sizes (winner's curse) [Kraft, 2008; O'Sullivan and Ioannidis, 2020; Xiao and Boehnke, 2009]. To examine the possibility that smaller sample sizes in brain structure traits may have inflated discoverability estimates, we compared discoverability estimates from historical schizophrenia GWAS with sample sizes ranging from  $N_{\text{eff}}=31\text{k}$  to  $N_{\text{eff}}=99\text{k}$  (**Supplementary Figure 8**). We found, as expected, that increased sample size is associated with decreased estimated effect size distributions. Nevertheless, the estimates of discoverability for each sample size have overlapping 95% CIs and the standard error decreases with increasing sample size. Future brain structure GWAS in larger sample sizes may therefore lead to decreased discoverability with tighter estimates, but nevertheless we expect that those estimates will likely be contained within the CIs shown here, if the assumptions for the estimation procedure in GENESIS have been met. The sample sizes were relatively smaller in cortical/subcortical structures compared to behavioral traits (e.g. mean value of sample size is 32,512 for cortical surface area 193,640 for behavioral traits, *Welch's t*-test  $p = 0.048$ ) so future exploration of genetic architecture in increased sample sizes will help solidify the findings of decreased polygenicity and increased discoverability of brain structure traits relative to neuropsychiatric disorders and cognitive traits. Second, in this study we only tested two- or three-component mixture models to estimate polygenicity and discoverability, consistent with previous work [Zhang et al., 2018]. Given the inflations shown in QQ-plots for some traits (**Supplementary Figure 1-5**), more complex models (> 3 components) may better fit the effect size distributions. Finally, in this study we identified all sSNPs regardless of their genomic position or functional annotation. Future studies may explore discoverability within specific functional categories (e.g. enhancers present within a

cell-type or context) to derive specific hypotheses about the mechanisms underlying trait variation [Johnson et al., 2020; Shadrin et al., 2020].

## Conclusion

Overall, our results use estimates of genetic architecture to test long-standing hypotheses about brain structure traits as endophenotypes for neuropsychiatric disorders.

## References

Adams HHH, Hibar DP, Chouraki V, Stein JL, Nyquist PA, Rentería ME, Trompet S, Arias-Vasquez A, Seshadri S, Desrivières S, Beecham AH, Jahanshad N, Wittfeld K, Van der Lee SJ, Abramovic L, Alhusaini S, Amin N, Andersson M, Arfanakis K, Aribisala BS, Armstrong NJ, Athanasiu L, Axelsson T, Beiser A, Bernard M, Bis JC, Blanken LME, Blanton SH, Bohlken MM, Boks MP, Bralten J, Brickman AM, Carmichael O, Chakravarty MM, Chauhan G, Chen Q, Ching CRK, Cuellar-Partida G, Braber AD, Doan NT, Ehrlich S, Filippi I, Ge T, Giddaluru S, Goldman AL, Gottesman RF, Greven CU, Grimm O, Griswold ME, Guadalupe T, Hass J, Haukvik UK, Hilal S, Hofer E, Hoehn D, Holmes AJ, Hoogman M, Janowitz D, Jia T, Kasperaviciute D, Kim S, Klein M, Kraemer B, Lee PH, Liao J, Liewald DCM, Lopez LM, Luciano M, Macare C, Marquand A, Matarin M, Mather KA, Mattheisen M, Mazoyer B, McKay DR, McWhirter R, Milaneschi Y, Mirza-Schreiber N, Muetzel RL, Maniega SM, Nho K, Nugent AC, Loohuis LMO, Oosterlaan J, Papmeyer M, Pappa I, Pirpamer L, Pudas S, Pütz B, Rajan KB, Ramasamy A, Richards JS, Risacher SL, Roiz-Santiañez R, Rommelse N, Rose EJ, Royle NA, Rundek T, Sämann PG, Satizabal CL, Schmaal L, Schork AJ, Shen L, Shin J, Shumskaya E, Smith AV, Sprooten E, Strike LT, Teumer A, Thomson R, Tordesillas-Gutierrez D, Toro R, Trabzuni D, Vaidya D, Van der Grond J, Van der Meer D, Van Donkelaar MMJ, Van Eijk KR, Van Erp TGM, Van Rooij D, Walton E, Westlye LT, Whelan CD, Windham BG, Winkler AM, Woldehawariat G, Wolf C, Wolfers T, Xu B, Yanek LR, Yang J, Zijdenbos A, Zwiens MP, Agartz I, Aggarwal NT, Almasy L, Ames D, Amouyel P, Andreassen OA, Arepalli S, Assareh AA, Barral S, Bastin ME, Becker DM, Becker JT, Bennett DA, Blangero J, van Bokhoven H, Boomsma DI, Brodaty H, Brouwer RM, Brunner HG, Buckner RL, Buitelaar JK, Bulayeva KB, Cahn W, Calhoun VD, Cannon DM, Cavalleri GL, Chen C, Cheng C-Y, Cichon S, Cookson MR, Corvin A, Crespo-Facorro B, Curran JE, Czisch M, Dale AM, Davies GE, De Geus EJC, De Jager PL, de Zubicaray GI, Delanty N, Depondt C, DeStefano AL, Dillman A, Djurovic S, Donohoe G, Drevets WC, Duggirala R, Dyer TD, Erk S, Espeseth T, Evans DA, Fedko IO, Fernández G, Ferrucci L, Fisher SE, Fleischman DA, Ford I, Foroud TM, Fox PT, Francks C, Fukunaga M, Gibbs JR, Glahn DC, Gollub RL, Göring HHH, Grabe HJ, Green RC, Gruber O, Gudnason V, Guelfi S, Hansell NK, Hardy J, Hartman CA, Hashimoto R, Hegenscheid K, Heinz A, Le Hellard S, Hernandez DG, Heslenfeld DJ, Ho B-C, Hoekstra PJ, Hoffmann W, Hofman A, Holsboer F, Homuth G, Hosten N, Hottenga J-J, Hulshoff Pol HE, Ikeda M, Ikram MK, Jack CR Jr, Jenkinson M, Johnson R, Jönsson EG, Jukema JW, Kahn RS, Kanai R, Kloszewska I, Knopman DS, Kochunov P, Kwok JB, Lawrie SM, Lemaître H, Liu X, Longo DL, Longstreth WT Jr, Lopez OL, Lovestone S, Martinez O, Martinot J-L, Mattay VS, McDonald C, McIntosh AM, McMahon KL, McMahon FJ, Mecocci P, Melle I, Meyer-Lindenberg A,

- Mohnke S, Montgomery GW, Morris DW, Mosley TH, Mühleisen TW, Müller-Myhsok B, Nalls MA, Nauck M, Nichols TE, Niessen WJ, Nöthen MM, Nyberg L, Ohi K, Olvera RL, Ophoff RA, Pandolfo M, Paus T, Pausova Z, Penninx BWJH, Pike GB, Potkin SG, Psaty BM, Reppermund S, Rietschel M, Roffman JL, Romanczuk-Seiferth N, Rotter JI, Ryten M, Sacco RL, Sachdev PS, Saykin AJ, Schmidt R, Schofield PR, Sigurdsson S, Simmons A, Singleton A, Sisodiya SM, Smith C, Smoller JW, Soininen H, Srikanth V, Steen VM, Stott DJ, Sussmann JE, Thalamuthu A, Tiemeier H, Toga AW, Traynor BJ, Troncoso J, Turner JA, Tzourio C, Uitterlinden AG, Hernández MCV, Van der Brug M, Van der Lugt A, Van der Wee NJA, Van Duijn CM, Van Haren NEM, Van T Ent D, Van Tol M-J, Vardarajan BN, Veltman DJ, Vernooij MW, Völzke H, Walter H, Wardlaw JM, Wassink TH, Weale ME, Weinberger DR, Weiner MW, Wen W, Westman E, White T, Wong TY, Wright CB, Zielke HR, Zonderman AB, Deary IJ, DeCarli C, Schmidt H, Martin NG, De Craen AJM, Wright MJ, Launer LJ, Schumann G, Fornage M, Franke B, Debette S, Medland SE, Ikram MA, Thompson PM (2016): Novel genetic loci underlying human intracranial volume identified through genome-wide association. *Nat Neurosci* 19:1569–1582.
- Almasy L, Blangero J (2001): Endophenotypes as quantitative risk factors for psychiatric disease: rationale and study design. *Am J Med Genet* 105:42–44.
- Benjamini Y, Hochberg Y (1995): Controlling the False Discovery Rate: A Practical and Powerful Approach to Multiple Testing. *J R Stat Soc Series B Stat Methodol* 57:289–300.
- Bigos KL, Weinberger DR (2010): Imaging genetics--days of future past. *Neuroimage* 53:804–809.
- Bowton E, Field JR, Wang S, Schildcrout JS, Van Driest SL, Delaney JT, Cowan J, Weeke P, Mosley JD, Wells QS, Karnes JH, Shaffer C, Peterson JF, Denny JC, Roden DM, Pulley JM (2014): Biobanks and electronic medical records: enabling cost-effective research. *Sci Transl Med* 6:234cm3.
- Demontis D, Walters RK, Martin J, Mattheisen M, Als TD, Agerbo E, Baldursson G, Belliveau R, Bybjerg-Grauholm J, Bækvad-Hansen M, Cerrato F, Chambert K, Churchhouse C, Dumont A, Eriksson N, Gandal M, Goldstein JI, Grasby KL, Grove J, Gudmundsson OO, Hansen CS, Hauberg ME, Hollegaard MV, Howrigan DP, Huang H, Maller JB, Martin AR, Martin NG, Moran J, Pallesen J, Palmer DS, Pedersen CB, Pedersen MG, Poterba T, Poulsen JB, Ripke S, Robinson EB, Satterstrom FK, Stefansson H, Stevens C, Turley P, Walters GB, Won H, Wright MJ, ADHD Working Group of the Psychiatric Genomics Consortium (PGC), Early Lifecourse & Genetic Epidemiology (EAGLE) Consortium, 23andMe Research Team, Andreassen OA, Asherson P, Burton CL, Boomsma DI, Cormand B, Dalsgaard S, Franke B, Gelernter J, Geschwind D, Hakonarson H, Haavik J, Kranzler HR, Kuntsi J, Langley K, Lesch K-P, Middeldorp C, Reif A, Rohde LA, Roussos P, Schachar R, Sklar P, Sonuga-Barke EJS, Sullivan PF, Thapar A, Tung JY, Waldman ID, Medland SE, Stefansson K, Nordentoft M, Hougaard DM, Werge T, Mors O, Mortensen PB, Daly MJ, Faraone SV, Børglum AD, Neale BM (2019): Discovery of the first genome-wide significant risk loci for attention deficit/hyperactivity disorder. *Nat Genet* 51:63–75.
- Elliott LT, Sharp K, Alfaro-Almagro F, Shi S, Miller KL, Douaud G, Marchini J, Smith SM (2018): Genome-wide association studies of brain imaging phenotypes in UK Biobank. *Nature* 562:210–216.
- Flint J, Munafò MR (2007): The endophenotype concept in psychiatric genetics. *Psychol Med* 37:163–180.
- Franke B, Stein JL, Ripke S, Anttila V, Hibar DP, van Hulzen KJE, Arias-Vasquez A, Smoller JW, Nichols TE, Neale MC, McIntosh AM, Lee P, McMahon FJ, Meyer-Lindenberg A, Mattheisen M, Andreassen OA, Gruber O, Sachdev PS, Roiz-Santiañez R, Saykin AJ, Ehrlich S, Mather KA, Turner JA, Schwarz E, Thalamuthu A, Shugart YY, Ho YY, Martin NG, Wright MJ, Schizophrenia Working Group of the Psychiatric Genomics Consortium, ENIGMA Consortium, O'Donovan MC, Thompson PM, Neale BM, Medland SE, Sullivan PF

(2016): Genetic influences on schizophrenia and subcortical brain volumes: large-scale proof of concept. *Nat Neurosci* 19:420–431.

Grasby KL, Jahanshad N, Painter JN, Colodro-Conde L, Bralten J, Hibar DP, Lind PA, Pizzagalli F, Ching CRK, McMahon MAB, Shatikhina N, Zsembik LCP, Thomopoulos SI, Zhu AH, Strike LT, Agartz I, Alhusaini S, Almeida MAA, Alnæs D, Amlien IK, Andersson M, Ard T, Armstrong NJ, Ashley-Koch A, Atkins JR, Bernard M, Brouwer RM, Buimer EEL, Bülow R, Bürger C, Cannon DM, Chakravarty M, Chen Q, Cheung JW, Couvy-Duchesne B, Dale AM, Dalvie S, de Araujo TK, de Zubicaray GI, de Zwarte SMC, den Braber A, Doan NT, Dohm K, Ehrlich S, Engelbrecht H-R, Erk S, Fan CC, Fedko IO, Foley SF, Ford JM, Fukunaga M, Garrett ME, Ge T, Giddaluru S, Goldman AL, Green MJ, Groenewold NA, Grotegerd D, Gurholt TP, Gutman BA, Hansell NK, Harris MA, Harrison MB, Haswell CC, Hauser M, Herms S, Heslenfeld DJ, Ho NF, Hoehn D, Hoffmann P, Holleran L, Hoogman M, Hottenga J-J, Ikeda M, Janowitz D, Jansen IE, Jia T, Jockwitz C, Kanai R, Karama S, Kasperaviciute D, Kaufmann T, Kelly S, Kikuchi M, Klein M, Knapp M, Knodt AR, Krämer B, Lam M, Lancaster TM, Lee PH, Lett TA, Lewis LB, Lopes-Cendes I, Luciano M, Macciardi F, Marquand AF, Mathias SR, Melzer TR, Milaneschi Y, Mirza-Schreiber N, Moreira JCV, Mühleisen TW, Müller-Myhsok B, Najt P, Nakahara S, Nho K, Olde Loohuis LM, Orfanos DP, Pearson JF, Pitcher TL, Pütz B, Quidé Y, Ragothaman A, Rashid FM, Reay WR, Redlich R, Reinbold CS, Reppele J, Richard G, Riedel BC, Risacher SL, Rocha CS, Mota NR, Salminen L, Saremi A, Saykin AJ, Schlag F, Schmaal L, Schofield PR, Secolin R, Shapland CY, Shen L, Shin J, Shumskaya E, Sønderby IE, Sprooten E, Tansey KE, Teumer A, Thalamuthu A, Tordesillas-Gutiérrez D, Turner JA, Uhlmann A, Vallergera CL, van der Meer D, van Donkelaar MMJ, van Eijk L, van Erp TGM, van Haren NEM, van Rooij D, van Tol M-J, Veldink JH, Verhoef E, Walton E, Wang M, Wang Y, Wardlaw JM, Wen W, Westlye LT, Whelan CD, Witt SH, Wittfeld K, Wolf C, Wolfers T, Wu JQ, Yasuda CL, Zaremba D, Zhang Z, Zwiers MP, Artiges E, Assareh AA, Ayesa-Arriola R, Belger A, Brandt CL, Brown GG, Cichon S, Curran JE, Davies GE, Degenhardt F, Dennis MF, Dietsche B, Djurovic S, Doherty CP, Espiritu R, Garijo D, Gil Y, Gowland PA, Green RC, Häusler AN, Heindel W, Ho B-C, Hoffmann WU, Holsboer F, Homuth G, Hosten N, Jack CR Jr, Jang M, Jansen A, Kimbrel NA, Kolskår K, Koops S, Koops S, Krug A, Lim KO, Luyckx JJ, Mathalon DH, Mather KA, Mattay VS, Matthews S, Mayoral Van Son J, McEwen SC, Melle I, Morris DW, Mueller BA, Nauck M, Nordvik JE, Nöthen MM, O’Leary DS, Opel N, Martinot M-LP, Pike GB, Preda A, Quinlan EB, Rasser PE, Ratnakar V, Reppermund S, Steen VM, Tooney PA, Torres FR, Veltman DJ, Voyvodic JT, Whelan R, White T, Yamamori H, Adams HHH, Bis JC, Dabette S, Decarli C, Fornage M, Gudnason V, Hofer E, Ikram MA, Launer L, Longstreth WT, Lopez OL, Mazoyer B, Mosley TH, Roshchupkin GV, Satizabal CL, Schmidt R, Seshadri S, Yang Q, Alzheimer’s Disease Neuroimaging Initiative, CHARGE Consortium, EPIGEN Consortium, IMAGEN Consortium, SYS Consortium, Parkinson’s Progression Markers Initiative, Alvim MKM, Ames D, Anderson TJ, Andreassen OA, Arias-Vasquez A, Bastin ME, Baune BT, Beckham JC, Blangero J, Boomsma DI, Brodaty H, Brunner HG, Buckner RL, Buitelaar JK, Bustillo JR, Cahn W, Cairns MJ, Calhoun V, Carr VJ, Caseras X, Caspers S, Cavalleri GL, Cendes F, Corvin A, Crespo-Facorro B, Dalrymple-Alford JC, Dannlowski U, de Geus EJC, Deary IJ, Delanty N, Depondt C, Desrivières S, Donohoe G, Espeseth T, Fernández G, Fisher SE, Flor H, Forstner AJ, Francks C, Franke B, Glahn DC, Gollub RL, Grabe HJ, Gruber O, Håberg AK, Hariri AR, Hartman CA, Hashimoto R, Heinz A, Henskens FA, Hillegers MHJ, Hoekstra PJ, Holmes AJ, Hong LE, Hopkins WD, Hulshoff Pol HE, Jernigan TL, Jönsson EG, Kahn RS, Kennedy MA, Kircher TTJ, Kochunov P, Kwok JBB, Le Hellard S, Loughland CM, Martin NG, Martinot J-L, McDonald C, McMahon KL, Meyer-Lindenberg A, Michie PT, Morey RA, Mowry B, Nyberg L, Oosterlaan J, Ophoff RA, Pantelis C, Paus T, Pausova Z, Penninx BWJH, Polderman TJC, Posthuma D, Rietschel M, Roffman JL, Rowland LM, Sachdev PS,

Sämman PG, Schall U, Schumann G, Scott RJ, Sim K, Sisodiya SM, Smoller JW, Sommer IE, St Pourcain B, Stein DJ, Toga AW, Trollor JN, Van der Wee NJA, van 't Ent D, Völzke H, Walter H, Weber B, Weinberger DR, Wright MJ, Zhou J, Stein JL, Thompson PM, Medland SE, Enhancing Neuroimaging Genetics through Meta-Analysis Consortium (ENIGMA)—Genetics working group (2020): The genetic architecture of the human cerebral cortex. *Science* 367. <http://dx.doi.org/10.1126/science.aay6690>.

Hibar DP, Adams HHH, Jahanshad N, Chauhan G, Stein JL, Hofer E, Renteria ME, Bis JC, Arias-Vasquez A, Ikram MK, Desrivières S, Vernooij MW, Abramovic L, Alhusaini S, Amin N, Andersson M, Arfanakis K, Aribisala BS, Armstrong NJ, Athanasiu L, Axelsson T, Beecham AH, Beiser A, Bernard M, Blanton SH, Bohlken MM, Boks MP, Bralten J, Brickman AM, Carmichael O, Chakravarty MM, Chen Q, Ching CRK, Chouraki V, Cuellar-Partida G, Crivello F, Den Braber A, Doan NT, Ehrlich S, Giddaluru S, Goldman AL, Gottesman RF, Grimm O, Griswold ME, Guadalupe T, Gutman BA, Hass J, Haukvik UK, Hoehn D, Holmes AJ, Hoogman M, Janowitz D, Jia T, Jørgensen KN, Karbalai N, Kasperaviciute D, Kim S, Klein M, Kraemer B, Lee PH, Liewald DCM, Lopez LM, Luciano M, Macare C, Marquand AF, Matarin M, Mather KA, Mattheisen M, McKay DR, Milanesechi Y, Muñoz Maniega S, Nho K, Nugent AC, Nyquist P, Loohuis LMO, Oosterlaan J, Pampmeyer M, Pirpamer L, Pütz B, Ramasamy A, Richards JS, Risacher SL, Roiz-Santiañez R, Rommelse N, Ropele S, Rose EJ, Royle NA, Rundek T, Sämman PG, Saremi A, Satizabal CL, Schmaal L, Schork AJ, Shen L, Shin J, Shumskaya E, Smith AV, Sprooten E, Strike LT, Teumer A, Tordesillas-Gutierrez D, Toro R, Trabzuni D, Trompet S, Vaidya D, Van der Grond J, Van der Lee SJ, Van der Meer D, Van Donkelaar MMJ, Van Eijk KR, Van Erp TGM, Van Rooij D, Walton E, Westlye LT, Whelan CD, Windham BG, Winkler AM, Wittfeld K, Woldehawariat G, Wolf C, Wolfers T, Yanek LR, Yang J, Zijdenbos A, Zwiens MP, Agartz I, Almasy L, Ames D, Amouyel P, Andreassen OA, Arepalli S, Assareh AA, Barral S, Bastin ME, Becker DM, Becker JT, Bennett DA, Blangero J, van Bokhoven H, Boomsma DI, Brodaty H, Brouwer RM, Brunner HG, Buckner RL, Buitelaar JK, Bulayeva KB, Cahn W, Calhoun VD, Cannon DM, Cavalleri GL, Cheng C-Y, Cichon S, Cookson MR, Corvin A, Crespo-Facorro B, Curran JE, Czisch M, Dale AM, Davies GE, De Craen AJM, De Geus EJC, De Jager PL, De Zubicaray GI, Deary IJ, Dobbins S, DeCarli C, Delanty N, Depondt C, DeStefano A, Dillman A, Djurovic S, Donohoe G, Drevets WC, Duggirala R, Dyer TD, Enzinger C, Erk S, Espeseth T, Fedko IO, Fernández G, Ferrucci L, Fisher SE, Fleischman DA, Ford I, Fornage M, Foroud TM, Fox PT, Francks C, Fukunaga M, Gibbs JR, Glahn DC, Gollub RL, Göring HHH, Green RC, Gruber O, Gudnason V, Guelfi S, Håberg AK, Hansell NK, Hardy J, Hartman CA, Hashimoto R, Hegenscheid K, Heinz A, Le Hellard S, Hernandez DG, Heslenfeld DJ, Ho B-C, Hoekstra PJ, Hoffmann W, Hofman A, Holsboer F, Homuth G, Hosten N, Hottenga J-J, Huentelman M, Hulshoff Pol HE, Ikeda M, Jack CR Jr, Jenkinson M, Johnson R, Jönsson EG, Jukema JW, Kahn RS, Kanai R, Kloszewska I, Knopman DS, Kochunov P, Kwok JB, Lawrie SM, Lemaître H, Liu X, Longo DL, Lopez OL, Lovestone S, Martinez O, Martinot J-L, Mattay VS, McDonald C, McIntosh AM, McMahon FJ, McMahon KL, Mecocci P, Melle I, Meyer-Lindenberg A, Mohnke S, Montgomery GW, Morris DW, Mosley TH, Mühleisen TW, Müller-Myhsok B, Nalls MA, Nauck M, Nichols TE, Niessen WJ, Nöthen MM, Nyberg L, Ohi K, Olvera RL, Ophoff RA, Pandolfo M, Paus T, Pausova Z, Penninx BWJH, Pike GB, Potkin SG, Psaty BM, Reppermund S, Rietschel M, Roffman JL, Romanczuk-Seiferth N, Rotter JI, Ryten M, Sacco RL, Sachdev PS, Saykin AJ, Schmidt R, Schmidt H, Schofield PR, Sigurdsson S, Simmons A, Singleton A, Sisodiya SM, Smith C, Smoller JW, Soininen H, Steen VM, Stott DJ, Sussmann JE, Thalamuthu A, Toga AW, Traynor BJ, Troncoso J, Tzolaki M, Tzourio C, Uitterlinden AG, Hernández MCV, Van der Brug M, van der Lugt A, van der Wee NJA, Van Haren NEM, van 't Ent D, Van Tol M-J, Vardarajan BN, Vellas B, Veltman DJ, Völzke H, Walter H, Wardlaw JM, Wassink TH, Weale ME, Weinberger DR, Weiner MW, Wen W,



Westman E, White T, Wong TY, Wright CB, Zielke RH, Zonderman AB, Martin NG, Van Duijn CM, Wright MJ, Longstreth WT, Schumann G, Grabe HJ, Franke B, Launer LJ, Medland SE, Seshadri S, Thompson PM, Ikram MA (2017): Novel genetic loci associated with hippocampal volume. *Nat Commun* 8:13624.

Hibar DP, Stein JL, Renteria ME, Arias-Vasquez A, Desrivieres S, Jahanshad N, Toro R, Wittfeld K, Abramovic L, Andersson M, Aribisala BS, Armstrong NJ, Bernard M, Bohlken MM, Boks MP, Bralten J, Brown AA, Chakravarty MM, Chen Q, Ching CRK, Cuellar-Partida G, den Braber A, Giddaluru S, Goldman AL, Grimm O, Guadalupe T, Hass J, Woldehawariat G, Holmes AJ, Hoogman M, Janowitz D, Jia T, Kim S, Klein M, Kraemer B, Lee PH, Olde Loohuis LM, Luciano M, Macare C, Mather KA, Mattheisen M, Milaneschi Y, Nho K, Pappmeyer M, Ramasamy A, Risacher SL, Roiz-Santiañez R, Rose EJ, Salami A, Sämann PG, Schmaal L, Schork AJ, Shin J, Strike LT, Teumer A, van Donkelaar MMJ, van Eijk KR, Walters RK, Westlye LT, Whelan CD, Winkler AM, Zwiers MP, Alhusaini S, Athanasiu L, Ehrlich S, Hakobjan MMH, Hartberg CB, Haukvik UK, Heister AJGAM, Hoehn D, Kasperaviciute D, Liewald DCM, Lopez LM, Makkinje RRR, Matarin M, Naber MAM, McKay DR, Needham M, Nugent AC, Pütz B, Royle NA, Shen L, Sprooten E, Trabzuni D, van der Marel SSL, van Hulzen KJE, Walton E, Wolf C, Almasy L, Ames D, Arepalli S, Assareh AA, Bastin ME, Brodaty H, Bulayeva KB, Carless MA, Cichon S, Corvin A, Curran JE, Czisch M, de Zubicaray GI, Dillman A, Duggirala R, Dyer TD, Erk S, Fedko IO, Ferrucci L, Foroud TM, Fox PT, Fukunaga M, Gibbs JR, Göring HHH, Green RC, Guelfi S, Hansell NK, Hartman CA, Hegenscheid K, Heinz A, Hernandez DG, Heslenfeld DJ, Hoekstra PJ, Holsboer F, Homuth G, Hottenga J-J, Ikeda M, Jack CR Jr, Jenkinson M, Johnson R, Kanai R, Keil M, Kent JW Jr, Kochunov P, Kwok JB, Lawrie SM, Liu X, Longo DL, McMahon KL, Meisenzahl E, Melle I, Mohnke S, Montgomery GW, Mostert JC, Mühleisen TW, Nalls MA, Nichols TE, Nilsson LG, Nöthen MM, Ohi K, Olvera RL, Perez-Iglesias R, Pike GB, Potkin SG, Reinvang I, Reppermund S, Rietschel M, Romanczuk-Seiferth N, Rosen GD, Rujescu D, Schnell K, Schofield PR, Smith C, Steen VM, Sussmann JE, Thalamuthu A, Toga AW, Traynor BJ, Troncoso J, Turner JA, Valdés Hernández MC, van 't Ent D, van der Brug M, van der Wee NJA, van Tol M-J, Veltman DJ, Wassink TH, Westman E, Zielke RH, Zonderman AB, Ashbrook DG, Hager R, Lu L, McMahon FJ, Morris DW, Williams RW, Brunner HG, Buckner RL, Buitelaar JK, Cahn W, Calhoun VD, Cavalleri GL, Crespo-Facorro B, Dale AM, Davies GE, Delanty N, Depondt C, Djurovic S, Drevets WC, Espeseth T, Gollub RL, Ho B-C, Hoffmann W, Hosten N, Kahn RS, Le Hellard S, Meyer-Lindenberg A, Müller-Myhsok B, Nauck M, Nyberg L, Pandolfo M, Penninx BWJH, Roffman JL, Sisodiya SM, Smoller JW, van Bokhoven H, van Haren NEM, Völzke H, Walter H, Weiner MW, Wen W, White T, Agartz I, Andreassen OA, Blangero J, Boomsma DI, Brouwer RM, Cannon DM, Cookson MR, de Geus EJC, Deary IJ, Donohoe G, Fernández G, Fisher SE, Francks C, Glahn DC, Grabe HJ, Gruber O, Hardy J, Hashimoto R, Hulshoff Pol HE, Jönsson EG, Kloszewska I, Lovestone S, Mattay VS, Mecocci P, McDonald C, McIntosh AM, Ophoff RA, Paus T, Pausova Z, Ryten M, Sachdev PS, Saykin AJ, Simmons A, Singleton A, Soininen H, Wardlaw JM, Weale ME, Weinberger DR, Adams HHH, Launer LJ, Seiler S, Schmidt R, Chauhan G, Satizabal CL, Becker JT, Yanek L, van der Lee SJ, Ebling M, Fischl B, Longstreth WT Jr, Greve D, Schmidt H, Nyquist P, Vinke LN, van Duijn CM, Xue L, Mazoyer B, Bis JC, Gudnason V, Seshadri S, Ikram MA, Alzheimer's Disease Neuroimaging Initiative, CHARGE Consortium, EPIGEN, IMAGEN, SYS, Martin NG, Wright MJ, Schumann G, Franke B, Thompson PM, Medland SE (2015): Common genetic variants influence human subcortical brain structures. *Nature* 520:224–229.

Holland D, Frei O, Desikan R, Fan C-C, Shadrin AA, Smeland OB, Sundar VS, Thompson P, Andreassen OA, Dale AM (2020): Beyond SNP heritability: Polygenicity and discoverability of phenotypes estimated with a univariate Gaussian mixture model. *PLoS Genet* 16:e1008612.

- Howard DM, Adams MJ, Clarke T-K, Hafferty JD, Gibson J, Shirali M, Coleman JRI, Hagenaars SP, Ward J, Wigmore EM, Alloza C, Shen X, Barbu MC, Xu EY, Whalley HC, Marioni RE, Porteous DJ, Davies G, Deary IJ, Hemani G, Berger K, Teismann H, Rawal R, Arovt V, Baune BT, Dannlowski U, Domschke K, Tian C, Hinds DA, 23andMe Research Team, Major Depressive Disorder Working Group of the Psychiatric Genomics Consortium, Trzaskowski M, Byrne EM, Ripke S, Smith DJ, Sullivan PF, Wray NR, Breen G, Lewis CM, McIntosh AM (2019): Genome-wide meta-analysis of depression identifies 102 independent variants and highlights the importance of the prefrontal brain regions. *Nat Neurosci* 22:343–352.
- Johnson R, Burch KS, Hou K, Paciuć M, Pasaniuc B, Sankararaman S (2020): A Scalable Method for Estimating the Regional Polygenicity of Complex Traits. In: . *Research in Computational Molecular Biology*. Springer International Publishing. pp 253–254.
- Kendler KS, Neale MC (2010): Endophenotype: a conceptual analysis. *Mol Psychiatry* 15:789–797.
- Klein M, Walters RK, Demontis D, Stein JL, Hibar DP, Adams HH, Bralten J, Roth Mota N, Schachar R, Sonuga-Barke E, Mattheisen M, Neale BM, Thompson PM, Medland SE, Børglum AD, Faraone SV, Arias-Vasquez A, Franke B (2019): Genetic Markers of ADHD-Related Variations in Intracranial Volume. *Am J Psychiatry* 176:228–238.
- Kraft P (2008): Curses—Winner’s and Otherwise—in Genetic Epidemiology. *Epidemiology* 19:649.
- Le BD, Stein JL (2019): Mapping causal pathways from genetics to neuropsychiatric disorders using genome-wide imaging genetics: current status and future directions. *Psychiatry Clin Neurosci*. <http://dx.doi.org/10.1111/pcn.12839>.
- Liang D, Elwell AL, Aygün N, Lafferty MJ, Krupa O, Cheek KE, Courtney KP, Yusupova M, Garrett ME, Ashley-Koch A, Crawford GE, Love MI, de la Torre-Ubieta L, Geschwind DH, Stein JL (2020): Cell-type specific effects of genetic variation on chromatin accessibility during human neuronal differentiation. *Biorxiv*. <http://dx.doi.org/10.1101/2020.01.13.904862>.
- Liu M, Jiang Y, Wedow R, Li Y, Brazel DM, Chen F, Datta G, Davila-Velderrain J, McGuire D, Tian C, Zhan X, 23andMe Research Team, HUNT All-In Psychiatry, Choquet H, Docherty AR, Faul JD, Foerster JR, Fritsche LG, Gabrielsen ME, Gordon SD, Haessler J, Hottenga J-J, Huang H, Jang S-K, Jansen PR, Ling Y, Mägi R, Matoba N, McMahon G, Mulas A, Orrù V, Palviainen T, Pandit A, Reginsson GW, Skogholt AH, Smith JA, Taylor AE, Turman C, Willemsen G, Young H, Young KA, Zajac GJM, Zhao W, Zhou W, Bjornsdottir G, Boardman JD, Boehnke M, Boomsma DI, Chen C, Cucca F, Davies GE, Eaton CB, Ehringer MA, Esko T, Fiorillo E, Gillespie NA, Gudbjartsson DF, Haller T, Harris KM, Heath AC, Hewitt JK, Hickie IB, Hokanson JE, Hopfer CJ, Hunter DJ, Iacono WG, Johnson EO, Kamatani Y, Kardina SLR, Keller MC, Kellis M, Kooperberg C, Kraft P, Krauter KS, Laakso M, Lind PA, Loukola A, Lutz SM, Madden PAF, Martin NG, McGue M, McQueen MB, Medland SE, Metspalu A, Mohlke KL, Nielsen JB, Okada Y, Peters U, Polderman TJC, Posthuma D, Reiner AP, Rice JP, Rimm E, Rose RJ, Runarsdottir V, Stallings MC, Stančáková A, Stefansson H, Thai KK, Tindle HA, Tyrfingsson T, Wall TL, Weir DR, Weisner C, Whitfield JB, Winsvold BS, Yin J, Zuccolo L, Bierut LJ, Hveem K, Lee JJ, Munafò MR, Saccone NL, Willer CJ, Cornelis MC, David SP, Hinds DA, Jorgenson E, Kaprio J, Stitzel JA, Stefansson K, Thorgeirsson TE, Abecasis G, Liu DJ, Vrieze S (2019): Association studies of up to 1.2 million individuals yield new insights into the genetic etiology of tobacco and alcohol use. *Nat Genet* 51:237–244.
- Li YI, van de Geijn B, Raj A, Knowles DA, Petti AA, Golan D, Gilad Y, Pritchard JK (2016): RNA splicing is a primary link between genetic variation and disease. *Science* 352:600–604.
- Matoba N, Liang D, Sun H, Aygün N, McAfee JC, Davis JE, Raffield LM, Qian H, Piven J, Li Y, Others (2020): Common genetic risk variants identified in the SPARK cohort implicate

DDHD2 as a novel autism risk gene. medRxiv.

<https://www.medrxiv.org/content/10.1101/2020.01.13.20017319v1.abstract>.

Meyer-Lindenberg A, Weinberger DR (2006): Intermediate phenotypes and genetic mechanisms of psychiatric disorders. *Nat Rev Neurosci* 7:818–827.

O'Sullivan JW, Ioannidis J (2020): Reproducibility in the UK Biobank of Genome-Wide Significant Signals Discovered in Earlier Genome-wide Association Studies. *Genetic and Genomic Medicine*. medRxiv.

<https://www.medrxiv.org/content/10.1101/2020.06.24.20139576v1>.

Pardiñas AF, Holmans P, Pocklington AJ, Escott-Price V, Ripke S, Carrera N, Legge SE, Bishop S, Cameron D, Hamshere ML, Han J, Hubbard L, Lynham A, Mantripragada K, Rees E, MacCabe JH, McCarroll SA, Baune BT, Breen G, Byrne EM, Dannlowski U, Eley TC, Hayward C, Martin NG, McIntosh AM, Plomin R, Porteous DJ, Wray NR, Caballero A, Geschwind DH, Huckins LM, Ruderfer DM, Santiago E, Sklar P, Stahl EA, Won H, Agerbo E, Als TD, Andreassen OA, Bækvad-Hansen M, Mortensen PB, Pedersen CB, Børglum AD, Bybjerg-Grauholm J, Djurovic S, Durmishi N, Pedersen MG, Golimbet V, Grove J, Hougaard DM, Mattheisen M, Molden E, Mors O, Nordentoft M, Pejovic-Milovancevic M, Sigurdsson E, Silagadze T, Hansen CS, Stefansson K, Stefansson H, Steinberg S, Tosato S, Werge T, GERAD1 Consortium:, CRESTAR Consortium:, Collier DA, Rujescu D, Kirov G, Owen MJ, O'Donovan MC, Walters JTR, GERAD1 Consortium, CRESTAR Consortium, GERAD1 Consortium, CRESTAR Consortium (2018): Common schizophrenia alleles are enriched in mutation-intolerant genes and in regions under strong background selection. *Nat Genet* 50:381–389.

Ripke S, O'Dushlaine C, Chambert K, Moran JL, Kähler AK, Akterin S, Bergen SE, Collins AL, Crowley JJ, Fromer M, Kim Y, Lee SH, Magnusson PKE, Sanchez N, Stahl EA, Williams S, Wray NR, Xia K, Bettella F, Borglum AD, Bulik-Sullivan BK, Cormican P, Craddock N, de Leeuw C, Durmishi N, Gill M, Golimbet V, Hamshere ML, Holmans P, Hougaard DM, Kendler KS, Lin K, Morris DW, Mors O, Mortensen PB, Neale BM, O'Neill FA, Owen MJ, Milovancevic MP, Posthuma D, Powell J, Richards AL, Riley BP, Ruderfer D, Rujescu D, Sigurdsson E, Silagadze T, Smit AB, Stefansson H, Steinberg S, Suvisaari J, Tosato S, Verhage M, Walters JT, Multicenter Genetic Studies of Schizophrenia Consortium, Levinson DF, Gejman PV, Kendler KS, Laurent C, Mowry BJ, O'Donovan MC, Owen MJ, Pulver AE, Riley BP, Schwab SG, Wildenauer DB, Dudbridge F, Holmans P, Shi J, Albus M, Alexander M, Campion D, Cohen D, Dikeos D, Duan J, Eichhammer P, Godard S, Hansen M, Lerer FB, Liang K-Y, Maier W, Mallet J, Nertney DA, Nestadt G, Norton N, O'Neill FA, Papadimitriou GN, Ribble R, Sanders AR, Silverman JM, Walsh D, Williams NM, Wormley B, Psychosis Endophenotypes International Consortium, Arranz MJ, Bakker S, Bender S, Bramon E, Collier D, Crespo-Facorro B, Hall J, Iyegbe C, Jablensky A, Kahn RS, Kalaydjieva L, Lawrie S, Lewis CM, Lin K, Linszen DH, Mata I, McIntosh A, Murray RM, Ophoff RA, Powell J, Rujescu D, Van Os J, Walshe M, Weisbrod M, Wiersma D, Wellcome Trust Case Control Consortium 2, Donnelly P, Barroso I, Blackwell JM, Bramon E, Brown MA, Casas JP, Corvin AP, Deloukas P, Duncanson A, Jankowski J, Markus HS, Mathew CG, Palmer CNA, Plomin R, Rautanen A, Sawcer SJ, Trembath RC, Viswanathan AC, Wood NW, Spencer CCA, Band G, Bellenguez C, Freeman C, Hellenthal G, Giannoulatou E, Pirinen M, Pearson RD, Strange A, Su Z, Vukcevic D, Donnelly P, Langford C, Hunt SE, Edkins S, Gwilliam R, Blackburn H, Bumpstead SJ, Dronov S, Gillman M, Gray E, Hammond N, Jayakumar A, McCann OT, Liddle J, Potter SC, Ravindrarajah R, Ricketts M, Tashakkori-Ghanbaria A, Waller MJ, Weston P, Widaa S, Whittaker P, Barroso I, Deloukas P, Mathew CG, Blackwell JM, Brown MA, Corvin AP, McCarthy MI, Spencer CCA, Bramon E, Corvin AP, O'Donovan MC, Stefansson K, Scolnick E, Purcell S, McCarroll SA, Sklar P, Hultman CM, Sullivan PF (2013): Genome-wide association analysis identifies 13 new risk loci for schizophrenia. *Nat Genet* 45:1150–1159.

Satizabal CL, Adams HHH, Hibar DP, White CC, Knol MJ, Stein JL, Scholz M, Sargurupremraj M, Jahanshad N, Roshchupkin GV, Smith AV, Bis JC, Jian X, Luciano M, Hofer E, Teumer A, van der Lee SJ, Yang J, Yanek LR, Lee TV, Li S, Hu Y, Koh JY, Eicher JD, Desrivières S, Arias-Vasquez A, Chauhan G, Athanasiu L, Rentería ME, Kim S, Hoehn D, Armstrong NJ, Chen Q, Holmes AJ, den Braber A, Kloszewska I, Andersson M, Espeseth T, Grimm O, Abramovic L, Alhusaini S, Milaneschi Y, Pappmeyer M, Axelsson T, Ehrlich S, Roiz-Santiañez R, Kraemer B, Håberg AK, Jones HJ, Pike GB, Stein DJ, Stevens A, Bralten J, Vernooij MW, Harris TB, Filippi I, Witte AV, Guadalupe T, Wittfeld K, Mosley TH, Becker JT, Doan NT, Hagenaars SP, Saba Y, Cuellar-Partida G, Amin N, Hilal S, Nho K, Mirza-Schreiber N, Arfanakis K, Becker DM, Ames D, Goldman AL, Lee PH, Boomsma DI, Lovestone S, Giddaluru S, Le Hellard S, Mattheisen M, Bohlken MM, Kasperaviciute D, Schmaal L, Lawrie SM, Agartz I, Walton E, Tordesillas-Gutierrez D, Davies GE, Shin J, Ipser JC, Vinke LN, Hoogman M, Jia T, Burkhardt R, Klein M, Crivello F, Janowitz D, Carmichael O, Haukvik UK, Aribisala BS, Schmidt H, Strike LT, Cheng C-Y, Risacher SL, Pütz B, Fleischman DA, Assareh AA, Mattay VS, Buckner RL, Mecocci P, Dale AM, Cichon S, Boks MP, Matarin M, Penninx BWJH, Calhoun VD, Chakravarty MM, Marquand AF, Macare C, Kharabian Masouleh S, Oosterlaan J, Amouyel P, Hegenscheid K, Rotter JI, Schork AJ, Liewald DCM, de Zubicaray GI, Wong TY, Shen L, Sämann PG, Brodaty H, Roffman JL, de Geus EJC, Tzolaki M, Erk S, van Eijk KR, Cavalleri GL, van der Wee NJA, McIntosh AM, Gollub RL, Bulayeva KB, Bernard M, Richards JS, Himali JJ, Loeffler M, Rommelse N, Hoffmann W, Westlye LT, Valdés Hernández MC, Hansell NK, van Erp TGM, Wolf C, Kwok JBJ, Vellas B, Heinz A, Olde Loohuis LM, Delanty N, Ho B-C, Ching CRK, Shumskaya E, Singh B, Hofman A, van der Meer D, Homuth G, Psaty BM, Bastin ME, Montgomery GW, Foroud TM, Reppermund S, Hottenga J-J, Simmons A, Meyer-Lindenberg A, Cahn W, Whelan CD, van Donkelaar MMJ, Yang Q, Hosten N, Green RC, Thalamuthu A, Mohnke S, Hulshoff Pol HE, Lin H, Jack CR Jr, Schofield PR, Mühleisen TW, Maillard P, Potkin SG, Wen W, Fletcher E, Toga AW, Gruber O, Huentelman M, Davey Smith G, Launer LJ, Nyberg L, Jönsson EG, Crespo-Facorro B, Koen N, Greve DN, Uitterlinden AG, Weinberger DR, Steen VM, Fedko IO, Groenewold NA, Niessen WJ, Toro R, Tzourio C, Longstreth WT Jr, Ikram MK, Smoller JW, van Tol M-J, Sussmann JE, Paus T, Lemaître H, Schroeter ML, Mazoyer B, Andreassen OA, Holsboer F, Depondt C, Veltman DJ, Turner JA, Pausova Z, Schumann G, van Rooij D, Djurovic S, Deary IJ, McMahon KL, Müller-Myhsok B, Brouwer RM, Soininen H, Pandolfo M, Wassink TH, Cheung JW, Wolfers T, Martinot J-L, Zwiers MP, Nauck M, Melle I, Martin NG, Kanai R, Westman E, Kahn RS, Sisodiya SM, White T, Saremi A, van Bokhoven H, Brunner HG, Völzke H, Wright MJ, van 't Ent D, Nöthen MM, Ophoff RA, Buitelaar JK, Fernández G, Sachdev PS, Rietschel M, van Haren NEM, Fisher SE, Beiser AS, Francks C, Saykin AJ, Mather KA, Romanczuk-Seiferth N, Hartman CA, DeStefano AL, Heslenfeld DJ, Weiner MW, Walter H, Hoekstra PJ, Nyquist PA, Franke B, Bennett DA, Grabe HJ, Johnson AD, Chen C, van Duijn CM, Lopez OL, Fornage M, Wardlaw JM, Schmidt R, DeCarli C, De Jager PL, Villringer A, Debette S, Gudnason V, Medland SE, Shulman JM, Thompson PM, Seshadri S, Ikram MA (2019): Genetic architecture of subcortical brain structures in 38,851 individuals. *Nat Genet* 51:1624–1636.

Savage JE, Jansen PR, Stringer S, Watanabe K, Bryois J, de Leeuw CA, Nagel M, Awasthi S, Barr PB, Coleman JRI, Grasby KL, Hammerschlag AR, Kaminski JA, Karlsson R, Krapohl E, Lam M, Nygaard M, Reynolds CA, Trampush JW, Young H, Zabaneh D, Hägg S, Hansell NK, Karlsson IK, Linnarsson S, Montgomery GW, Muñoz-Manchado AB, Quinlan EB, Schumann G, Skene NG, Webb BT, White T, Arking DE, Avramopoulos D, Bilder RM, Bitsios P, Burdick KE, Cannon TD, Chiba-Falek O, Christoforou A, Cirulli ET, Congdon E, Corvin A, Davies G, Deary IJ, DeRosse P, Dickinson D, Djurovic S, Donohoe G, Conley ED, Eriksson JG, Espeseth T, Freimer NA, Giakoumaki S, Giegling I, Gill M, Glahn DC,

- Hariri AR, Hatzimanolis A, Keller MC, Knowles E, Koltai D, Konte B, Lahti J, Le Hellard S, Lencz T, Liewald DC, London E, Lundervold AJ, Malhotra AK, Melle I, Morris D, Need AC, Ollier W, Palotie A, Payton A, Pendleton N, Poldrack RA, Rääkkönen K, Reinvang I, Roussos P, Rujescu D, Sabb FW, Scult MA, Smeland OB, Smyrnis N, Starr JM, Steen VM, Stefanis NC, Straub RE, Sundet K, Tiemeier H, Voineskos AN, Weinberger DR, Widen E, Yu J, Abecasis G, Andreassen OA, Breen G, Christiansen L, Debrabant B, Dick DM, Heinz A, Hjerling-Leffler J, Ikram MA, Kendler KS, Martin NG, Medland SE, Pedersen NL, Plomin R, Polderman TJC, Ripke S, van der Sluis S, Sullivan PF, Vrieze SI, Wright MJ, Posthuma D (2018): Genome-wide association meta-analysis in 269,867 individuals identifies new genetic and functional links to intelligence. *Nat Genet* 50:912–919.
- Schizophrenia Working Group of the Psychiatric Genomics Consortium (2014): Biological insights from 108 schizophrenia-associated genetic loci. *Nature* 511:421–427.
- Schwarzer G, Carpenter JR, Rücker G (2015): *Meta-Analysis with R*. Springer International Publishing.
- Shadrin AA, Frei O, Smeland OB, Bettella F, O Connell KS, Gani O, Bahrami S, Uggem TKE, Djurovic S, Holland D, Andreassen OA, Dale AM (2020): Phenotype-specific differences in polygenicity and effect size distribution across functional annotation categories revealed by AI-MiXeR. *Bioinformatics*. <http://dx.doi.org/10.1093/bioinformatics/btaa568>.
- Stahl EA, Breen G, Forstner AJ, McQuillin A, Ripke S, Trubetskoy V, Mattheisen M, Wang Y, Coleman JRI, Gaspar HA, de Leeuw CA, Steinberg S, Pavlides JMW, Trzaskowski M, Byrne EM, Pers TH, Holmans PA, Richards AL, Abbott L, Agerbo E, Akil H, Albani D, Alliey-Rodriguez N, Als TD, Anjorin A, Antilla V, Awasthi S, Badner JA, Bækvad-Hansen M, Barchas JD, Bass N, Bauer M, Belliveau R, Bergen SE, Pedersen CB, Bøen E, Boks MP, Boocock J, Budde M, Bunney W, Burmeister M, Bybjerg-Grauholm J, Byerley W, Casas M, Cerrato F, Cervantes P, Chambert K, Charney AW, Chen D, Churchhouse C, Clarke T-K, Coryell W, Craig DW, Cruceanu C, Curtis D, Czerski PM, Dale AM, de Jong S, Degenhardt F, Del-Favero J, DePaulo JR, Djurovic S, Dobbyn AL, Dumont A, Elvsåshagen T, Escott-Price V, Fan CC, Fischer SB, Flickinger M, Foroud TM, Forty L, Frank J, Fraser C, Freimer NB, Frisén L, Gade K, Gage D, Garnham J, Giambartolomei C, Pedersen MG, Goldstein J, Gordon SD, Gordon-Smith K, Green EK, Green MJ, Greenwood TA, Grove J, Guan W, Guzman-Parra J, Hamshere ML, Hautzinger M, Heilbronner U, Herms S, Hipolito M, Hoffmann P, Holland D, Huckins L, Jamain S, Johnson JS, Juréus A, Kandaswamy R, Karlsson R, Kennedy JL, Kittel-Schneider S, Knowles JA, Kogevinas M, Koller AC, Kupka R, Lavebratt C, Lawrence J, Lawson WB, Leber M, Lee PH, Levy SE, Li JZ, Liu C, Lucae S, Maaser A, MacIntyre DJ, Mahon PB, Maier W, Martinsson L, McCarroll S, McGuffin P, McInnis MG, McKay JD, Medeiros H, Medland SE, Meng F, Milani L, Montgomery GW, Morris DW, Mühleisen TW, Mullins N, Nguyen H, Nievergelt CM, Adolfsson AN, Nwulia EA, O'Donovan C, Loohuis LMO, Ori APS, Oruc L, Ösby U, Perlis RH, Perry A, Pfennig A, Potash JB, Purcell SM, Regeer EJ, Reif A, Reinbold CS, Rice JP, Rivas F, Rivera M, Roussos P, Ruderfer DM, Ryu E, Sánchez-Mora C, Schatzberg AF, Scheftner WA, Schork NJ, Shannon Weickert C, Shekhtman T, Shilling PD, Sigurdsson E, Slaney C, Smeland OB, Sobell JL, Sørholm Hansen C, Spijker AT, St Clair D, Steffens M, Strauss JS, Streit F, Strohmaier J, Szlinger S, Thompson RC, Thorgeirsson TE, Treutlein J, Vedder H, Wang W, Watson SJ, Weickert TW, Witt SH, Xi S, Xu W, Young AH, Zandi P, Zhang P, Zöllner S, eQTLGen Consortium, BIOS Consortium, Adolfsson R, Agartz I, Alda M, Backlund L, Baune BT, Bellivier F, Berrettini WH, Biernacka JM, Blackwood DHR, Boehnke M, Børglum AD, Corvin A, Craddock N, Daly MJ, Dannlowski U, Esko T, Etain B, Frye M, Fullerton JM, Gershon ES, Gill M, Goes F, Grigoriu-Serbanescu M, Hauser J, Hougaard DM, Hultman CM, Jones I, Jones LA, Kahn RS, Kirov G, Landén M, Leboyer M, Lewis CM, Li QS, Lissowska J, Martin NG, Mayoral F, McElroy SL, McIntosh AM, McMahan FJ, Melle I, Metspalu A, Mitchell PB, Morken G, Mors O, Mortensen PB, Müller-Myhsok B, Myers RM,

- Neale BM, Nimgaonkar V, Nordentoft M, Nöthen MM, O'Donovan MC, Oedegaard KJ, Owen MJ, Paciga SA, Pato C, Pato MT, Posthuma D, Ramos-Quiroga JA, Ribasés M, Rietschel M, Rouleau GA, Schalling M, Schofield PR, Schulze TG, Serretti A, Smoller JW, Stefansson H, Stefansson K, Stordal E, Sullivan PF, Turecki G, Vaaler AE, Vieta E, Vincent JB, Werge T, Nurnberger JI, Wray NR, Di Florio A, Edenberg HJ, Cichon S, Ophoff RA, Scott LJ, Andreassen OA, Kelsoe J, Sklar P, Bipolar Disorder Working Group of the Psychiatric Genomics Consortium (2019): Genome-wide association study identifies 30 loci associated with bipolar disorder. *Nat Genet* 51:793–803.
- Stein JL, Medland SE, Vasquez AA, Hibar DP, Senstad RE, Winkler AM, Toro R, Appel K, Bartecek R, Bergmann Ø, Bernard M, Brown AA, Cannon DM, Chakravarty MM, Christoforou A, Domin M, Grimm O, Hollinshead M, Holmes AJ, Homuth G, Hottenga J-J, Langan C, Lopez LM, Hansell NK, Hwang KS, Kim S, Laje G, Lee PH, Liu X, Loth E, Lourdusamy A, Mattingsdal M, Mohnke S, Maniega SM, Nho K, Nugent AC, O'Brien C, Pappmeyer M, Pütz B, Ramasamy A, Rasmussen J, Rijpkema M, Risacher SL, Roddey JC, Rose EJ, Ryten M, Shen L, Sprooten E, Strengman E, Teumer A, Trabzuni D, Turner J, van Eijk K, van Erp TGM, van Tol M-J, Wittfeld K, Wolf C, Woudstra S, Aleman A, Alhusaini S, Almasy L, Binder EB, Brohawn DG, Cantor RM, Carless MA, Corvin A, Cizisch M, Curran JE, Davies G, de Almeida MAA, Delanty N, Depondt C, Duggirala R, Dyer TD, Erk S, Fagerness J, Fox PT, Freimer NB, Gill M, Göring HHH, Hagler DJ, Hoehn D, Holsboer F, Hoogman M, Hosten N, Jahanshad N, Johnson MP, Kasperaviciute D, Kent JW Jr, Kochunov P, Lancaster JL, Lawrie SM, Liewald DC, Mandl R, Matarin M, Mattheisen M, Meisenzahl E, Melle I, Moses EK, Mühleisen TW, Nauck M, Nöthen MM, Olvera RL, Pandolfo M, Pike GB, Puls R, Reinvang I, Rentería ME, Rietschel M, Roffman JL, Royle NA, Rujescu D, Savitz J, Schnack HG, Schnell K, Seiferth N, Smith C, Steen VM, Valdés Hernández MC, Van den Heuvel M, van der Wee NJ, Van Haren NEM, Veltman JA, Völzke H, Walker R, Westlye LT, Whelan CD, Agartz I, Boomsma DI, Cavalleri GL, Dale AM, Djurovic S, Drevets WC, Hagoort P, Hall J, Heinz A, Jack CR Jr, Foroud TM, Le Hellard S, Macciardi F, Montgomery GW, Poline JB, Porteous DJ, Sisodiya SM, Starr JM, Sussmann J, Toga AW, Veltman DJ, Walter H, Weiner MW, Alzheimer's Disease Neuroimaging Initiative, EPIGEN Consortium, IMAGEN Consortium, Saguenay Youth Study Group, Bis JC, Ikram MA, Smith AV, Gudnason V, Tzourio C, Vernooij MW, Launer LJ, DeCarli C, Seshadri S, Cohorts for Heart and Aging Research in Genomic Epidemiology Consortium, Andreassen OA, Apostolova LG, Bastin ME, Blangero J, Brunner HG, Buckner RL, Cichon S, Coppola G, de Zubicaray GI, Deary IJ, Donohoe G, de Geus EJC, Espeseth T, Fernández G, Glahn DC, Grabe HJ, Hardy J, Hulshoff Pol HE, Jenkinson M, Kahn RS, McDonald C, McIntosh AM, McMahon FJ, McMahon KL, Meyer-Lindenberg A, Morris DW, Müller-Myhsok B, Nichols TE, Ophoff RA, Paus T, Pausova Z, Penninx BW, Potkin SG, Sämann PG, Saykin AJ, Schumann G, Smoller JW, Wardlaw JM, Weale ME, Martin NG, Franke B, Wright MJ, Thompson PM, Enhancing Neuro Imaging Genetics through Meta-Analysis Consortium (2012): Identification of common variants associated with human hippocampal and intracranial volumes. *Nat Genet* 44:552–561.
- The 1000 Genomes Project Consortium (2015): A global reference for human genetic variation. *Nature*. <http://dx.doi.org/10.1038/nature15393>.
- The International HapMap 3 Consortium (2010): Integrating common and rare genetic variation in diverse human populations. *Nature* 467:52–58.
- de la Torre-Ubieta L, Stein JL, Won H, Opland CK, Liang D, Lu D, Geschwind DH (2018): The Dynamic Landscape of Open Chromatin during Human Cortical Neurogenesis. *Cell* 172:289–304.e18.
- Watanabe K, Stringer S, Frei O, Umićević Mirkov M, de Leeuw C, Polderman TJC, van der Sluis S, Andreassen OA, Neale BM, Posthuma D (2019): A global overview of pleiotropy and genetic architecture in complex traits. *Nat Genet* 51:1339–1348.

- Willer CJ, Li Y, Abecasis GR (2010): METAL: fast and efficient meta-analysis of genomewide association scans. *Bioinformatics* 26:2190–2191.
- Wray NR, Ripke S, Mattheisen M, Trzaskowski M, Byrne EM, Abdellaoui A, Adams MJ, Agerbo E, Air TM, Andlauer TMF, Bacanu S-A, Bækvad-Hansen M, Beekman AFT, Bigdeli TB, Binder EB, Blackwood DRH, Bryois J, Buttenschøn HN, Bybjerg-Grauholm J, Cai N, Castelao E, Christensen JH, Clarke T-K, Coleman JIR, Colodro-Conde L, Couvy-Duchesne B, Craddock N, Crawford GE, Crowley CA, Dashti HS, Davies G, Deary IJ, Degenhardt F, Derks EM, Direk N, Dolan CV, Dunn EC, Eley TC, Eriksson N, Escott-Price V, Kiadeh FHF, Finucane HK, Forstner AJ, Frank J, Gaspar HA, Gill M, Giusti-Rodríguez P, Goes FS, Gordon SD, Grove J, Hall LS, Hannon E, Hansen CS, Hansen TF, Herms S, Hickie IB, Hoffmann P, Homuth G, Horn C, Hottenga J-J, Hougaard DM, Hu M, Hyde CL, Ising M, Jansen R, Jin F, Jorgenson E, Knowles JA, Kohane IS, Kraft J, Kretschmar WW, Krogh J, Kutalik Z, Lane JM, Li Y, Li Y, Lind PA, Liu X, Lu L, MacIntyre DJ, MacKinnon DF, Maier RM, Maier W, Marchini J, Mbarek H, McGrath P, McGuffin P, Medland SE, Mehta D, Middeldorp CM, Mihailov E, Milaneschi Y, Milani L, Mill J, Mondimore FM, Montgomery GW, Mostafavi S, Mullins N, Nauck M, Ng B, Nivard MG, Nyholt DR, O'Reilly PF, Oskarsson H, Owen MJ, Painter JN, Pedersen CB, Pedersen MG, Peterson RE, Pettersson E, Peyrot WJ, Pistis G, Posthuma D, Purcell SM, Quiroz JA, Qvist P, Rice JP, Riley BP, Rivera M, Saeed Mirza S, Saxena R, Schoevers R, Schulte EC, Shen L, Shi J, Shyn SI, Sigurdsson E, Sinnamon GBC, Smit JH, Smith DJ, Stefansson H, Steinberg S, Stockmeier CA, Streit F, Strohmaier J, Tansey KE, Teismann H, Teumer A, Thompson W, Thomson PA, Thorgeirsson TE, Tian C, Traylor M, Treutlein J, Trubetskoy V, Uitterlinden AG, Umbricht D, Van der Auwera S, van Hemert AM, Viktorin A, Visscher PM, Wang Y, Webb BT, Weinsheimer SM, Wellmann J, Willemsen G, Witt SH, Wu Y, Xi HS, Yang J, Zhang F, eQTLGen, 23andMe, Arolt V, Baune BT, Berger K, Boomsma DI, Cichon S, Dannlowski U, de Geus ECJ, DePaulo JR, Domenici E, Domschke K, Esko T, Grabe HJ, Hamilton SP, Hayward C, Heath AC, Hinds DA, Kendler KS, Kloiber S, Lewis G, Li QS, Lucae S, Madden PFA, Magnusson PK, Martin NG, McIntosh AM, Metspalu A, Mors O, Mortensen PB, Müller-Myhsok B, Nordentoft M, Nöthen MM, O'Donovan MC, Paciga SA, Pedersen NL, Penninx BWJH, Perlis RH, Porteous DJ, Potash JB, Preisig M, Rietschel M, Schaefer C, Schulze TG, Smoller JW, Stefansson K, Tiemeier H, Uher R, Völzke H, Weissman MM, Werge T, Winslow AR, Lewis CM, Levinson DF, Breen G, Børglum AD, Sullivan PF, Major Depressive Disorder Working Group of the Psychiatric Genomics Consortium (2018): Genome-wide association analyses identify 44 risk variants and refine the genetic architecture of major depression. *Nat Genet* 50:668–681.
- Xiao R, Boehnke M (2009): Quantifying and correcting for the winner's curse in genetic association studies. *Genet Epidemiol* 33:453–462.
- Yengo L, Sidorenko J, Kemper KE, Zheng Z, Wood AR, Weedon MN, Frayling TM, Hirschhorn J, Yang J, Visscher PM, GIANT Consortium (2018): Meta-analysis of genome-wide association studies for height and body mass index in 700,000 individuals of European ancestry. *Hum Mol Genet* 27:3641–3649.
- Zhang Y, Qi G, Park J-H, Chatterjee N (2018): Estimation of complex effect-size distributions using summary-level statistics from genome-wide association studies across 32 complex traits. *Nat Genet* 50:1318–1326.
- Zhao B, Li T, Yang Y, Wang X, Luo T, Shan Y, Zhu Z, Xiong D, Hauberg ME, Bendl J, Fullard JF, Roussos P, Li Y, Stein JL, Zhu H (2020): Common genetic variation influencing human white matter microstructure. *bioRxiv*.  
<https://www.biorxiv.org/content/10.1101/2020.05.23.112409v2>.

## Conflict of Interest

The authors declare no competing financial interest.

## Acknowledgments

We express our gratitude to Drs. Nilanjan Chatterjee and Yan Zhang for their kind help in the use of GENESIS. JLS was supported by grants from the National Institute of Mental Health (NIMH) (R01MH118349, R01MH120125, R01MH121433). MIL was also supported by the NIMH(R01MH118349).

## Data Availability Statement

The data that support the findings of this study was derived from publicly available GWAS summary statistics described in the “*GWAS summary statistics*” in the Methods.



## Figure Legends

### Figure 1: Illustration of polygenicity and discoverability

For traits with higher polygenicity, more variants (LD independent susceptibility SNPs indicated as stars, left) are associated with the trait, each at lower effect size which leads to lower discoverability (right).

### Figure 2: Estimates of polygenicity across multiple complex brain-relevant traits

The predicted number of sSNPs shows **(a)** decreased polygenicity for cortical surface area compared to cortical thickness or subcortical volumes, and **(b)** decreased polygenicity for global cortical traits compared to neuropsychiatric disorders, addiction traits, cognition, and anthropometric measurements. **(c)** The significance after FDR correction between categories, calculated via a heterogeneity test. The horizontal line indicates  $-\log_{10}(\text{FDR} = 0.05)$ . Because standard error for polygenicity ( $\pi_c$ ) of the cuneus thickness was not able to be estimated, we excluded this region from the heterogeneity tests for cortical thickness. To avoid bias, we also excluded cuneus surface area when comparing cortical surface area and cortical thickness.

### Figure 3: Estimates of discoverability across multiple complex brain-relevant traits

The effect size distributions across traits suggest increased effect sizes in cortical structure compared to complex traits including four neuropsychiatric disorders, two addiction relevant traits, two cognitive traits, and two anthropometric measurements **(a - d)**. Joint effect sizes are an approximation of Pearson's correlation coefficient between sSNPs and phenotype. **(a)** M2/M3 indicates the best fit model for the traits. The effect size distribution (variance) shows increased absolute effect size for global cortical traits compared to neuropsychiatric disorders, addiction traits, cognition, and anthropometric measurements. **(b)** The ranked absolute effect size at the 50th percentile of observed sSNPs were compared. The red horizontal line indicates the 50% probability. **(c)** A comparison of the absolute effect size at the 50th percentile across traits. Note that phenotypes annotated with a \* require caution in interpretation because the lower limit of the 95% CI of proportion of sSNPs in cluster 1 (the larger variance component) was estimated to be a negative value and we limited it to 0 for these phenotypes (all sSNPs were considered in cluster 2 (smaller variance component) in this case). The significance between categories under FDR correction, calculated via a heterogeneity test, is displayed in **(d)**. The horizontal line indicates  $-\log_{10}(\text{FDR} = 0.05)$ . See also **Supplementary Figure 6** for comparison across cortical/subcortical regions.

### Figure 4: Predicted sample sizes required to explain the full heritability of traits

Predicted required sample size (up to 20M) for brain related phenotypes. **(a)** The y axis shows the predicted sample size to explain 99% of heritability explained by GWS sSNPs. Phenotypes that did not reach 99% were labeled with the predicted percentage of heritability explained at a sample size of 20M. 1. neuropsychiatric disorders, 2. addiction relative traits, 3. Cognition, 4. anthropometric measurements. Regions colored by sample sizes needed to attain full heritability for **(b)** cortical surface area or **(c)** thickness.

Oligogenic

Polygenic

polygenicity

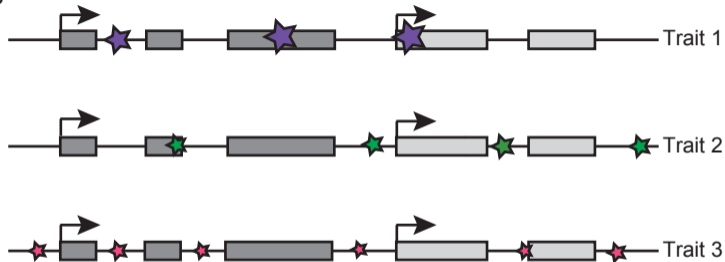

☆ susceptibility SNP

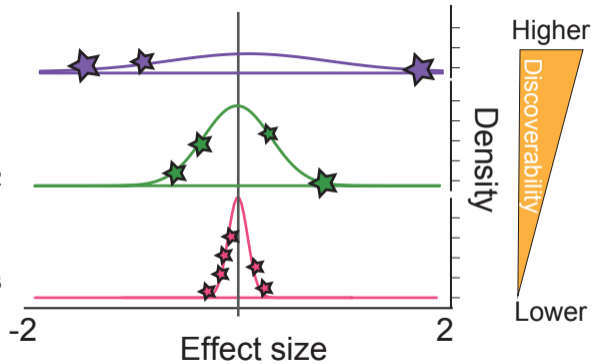

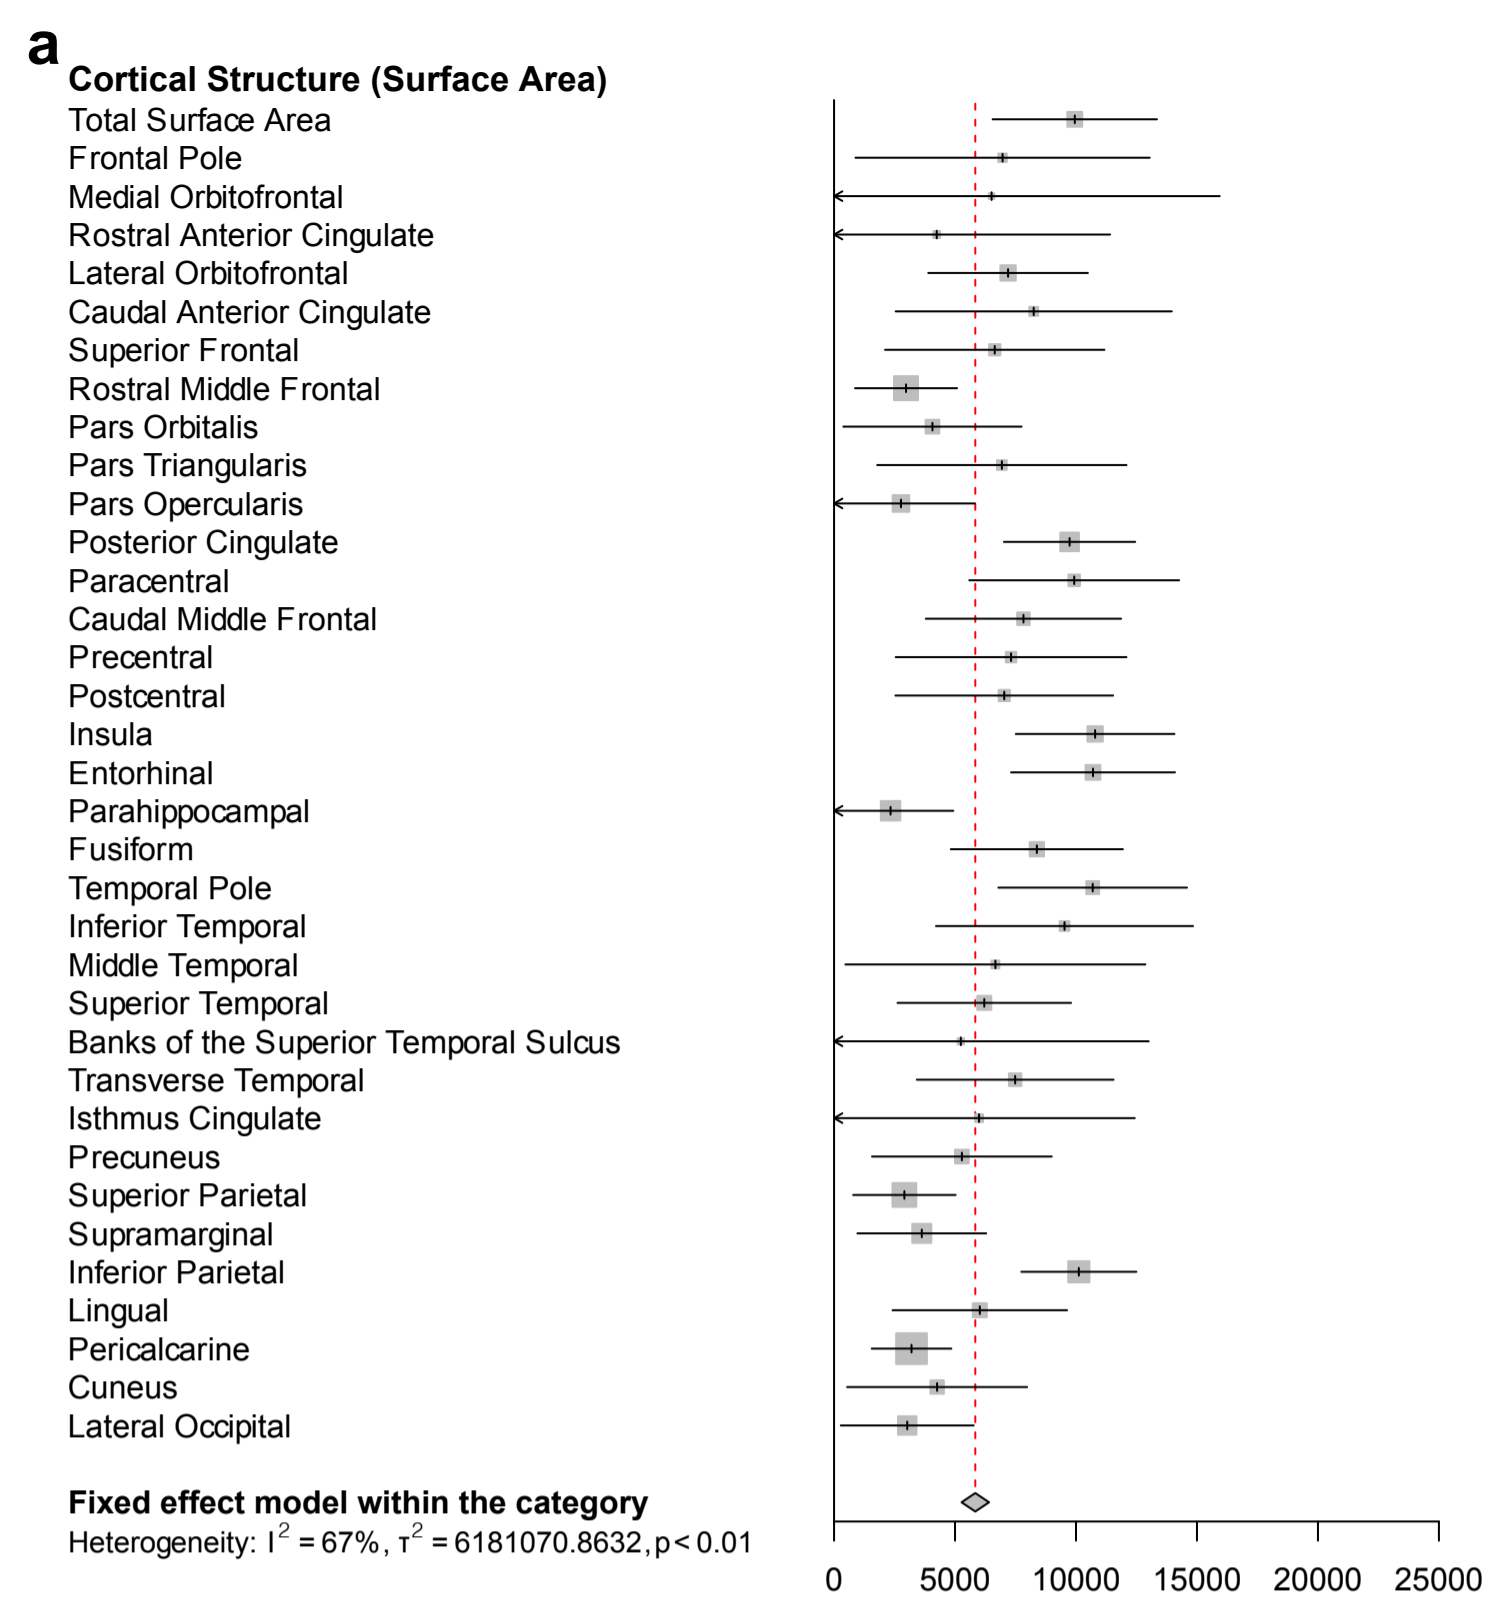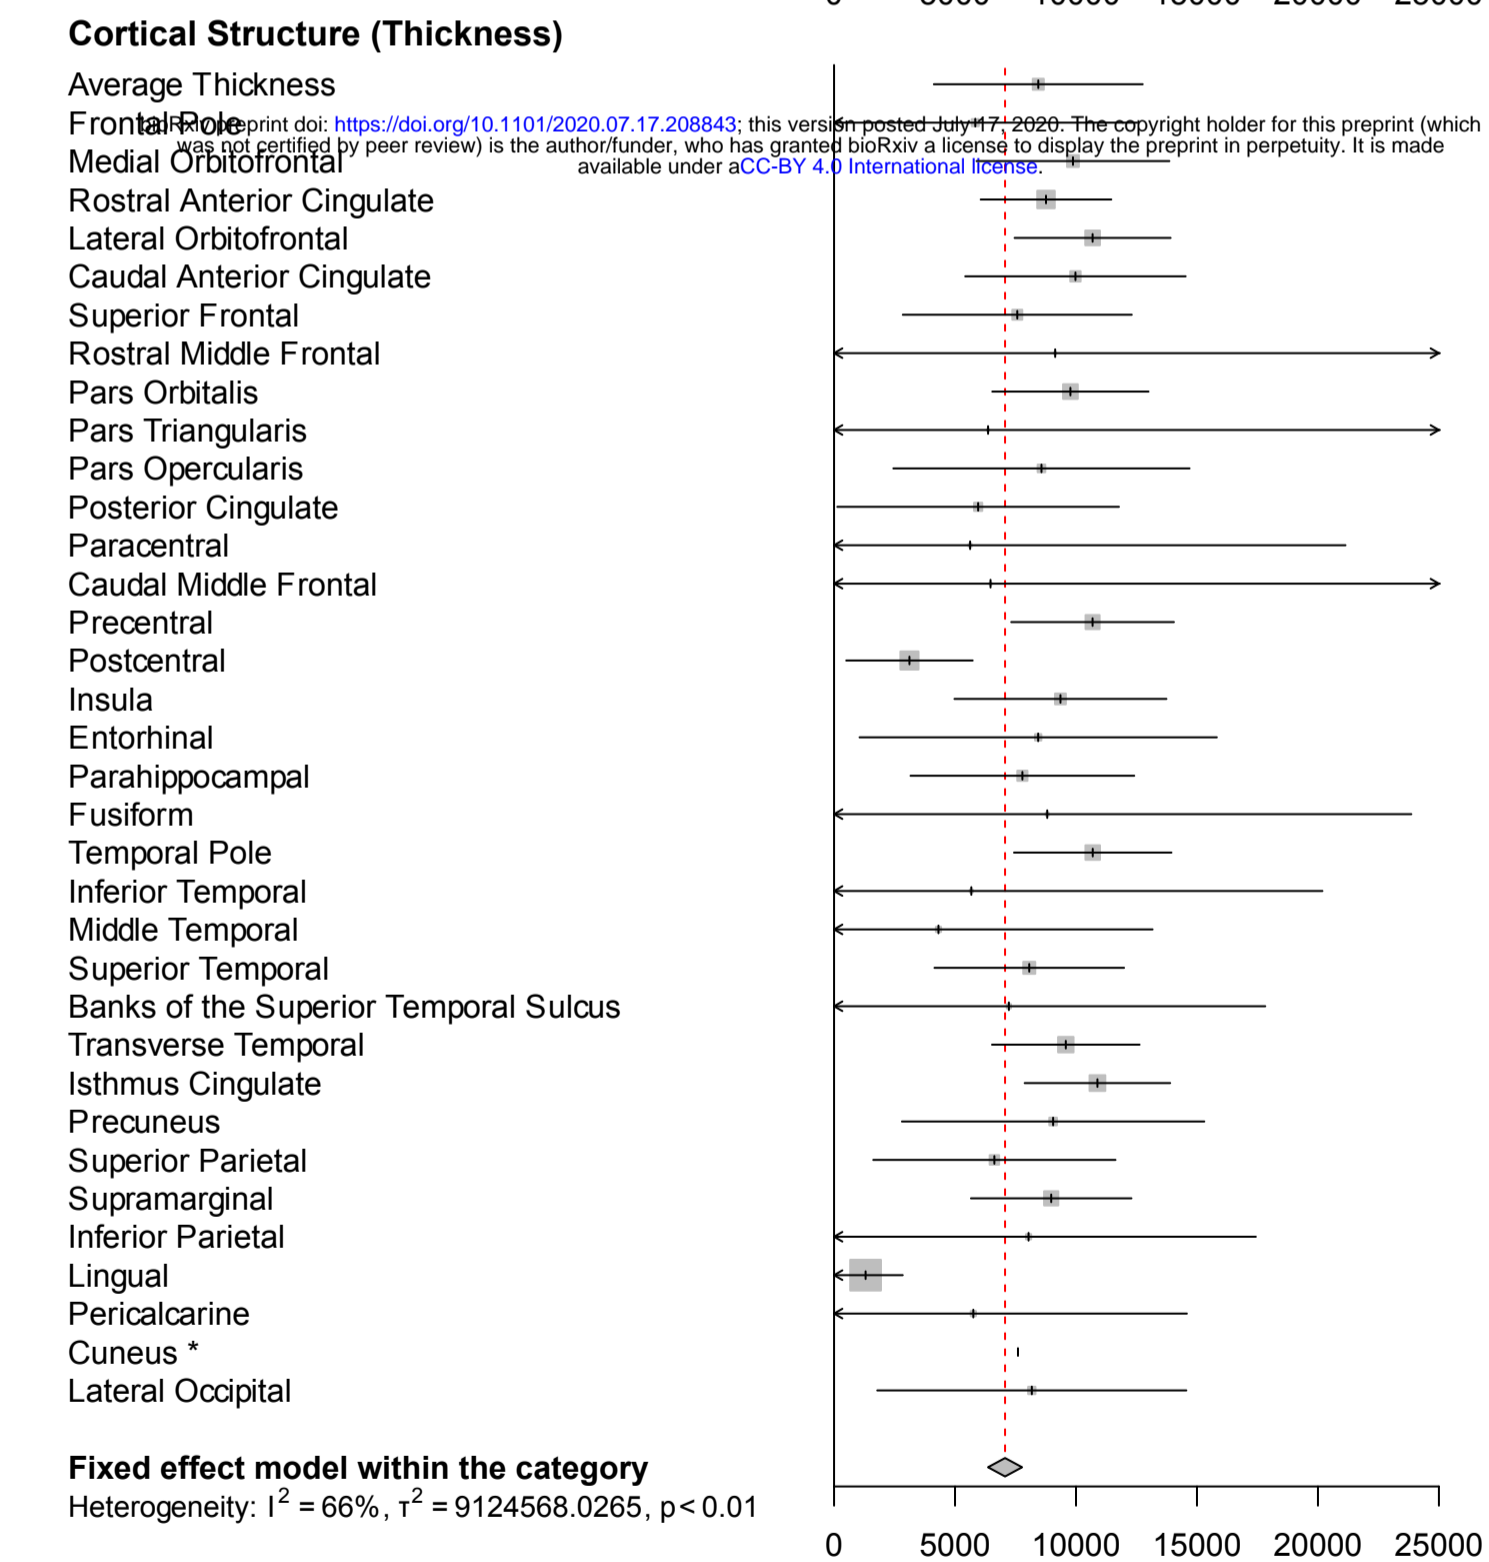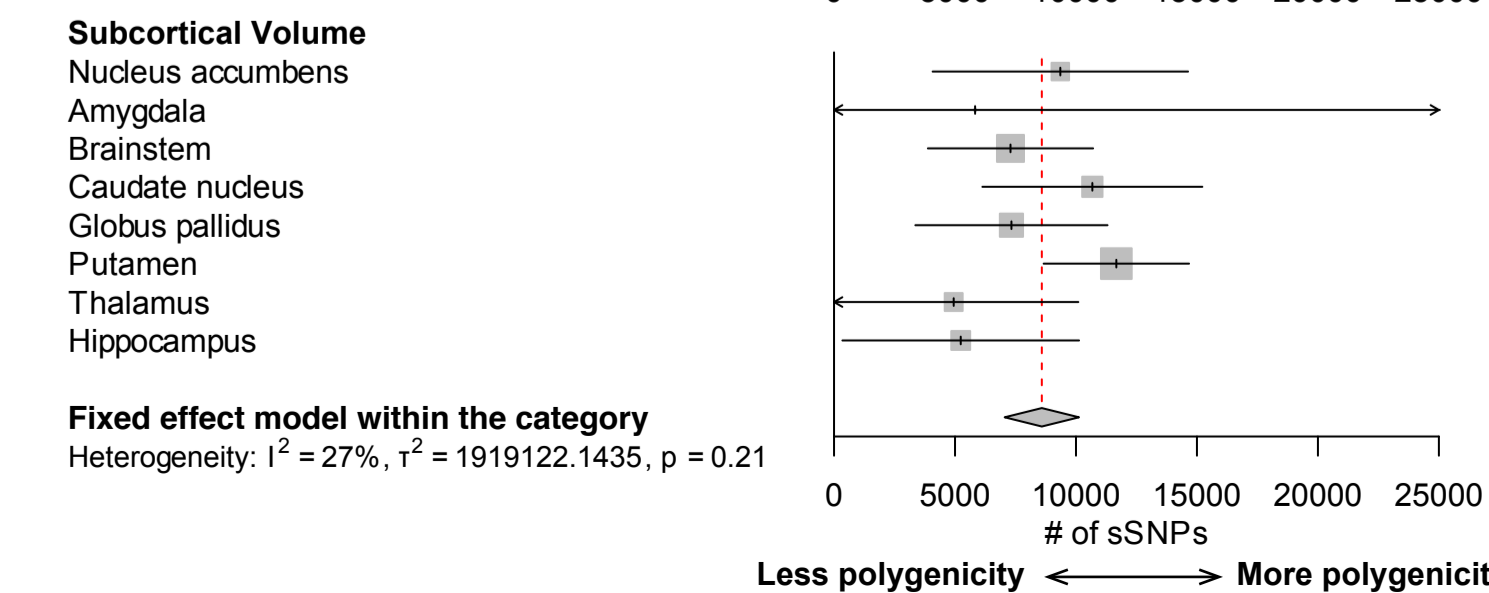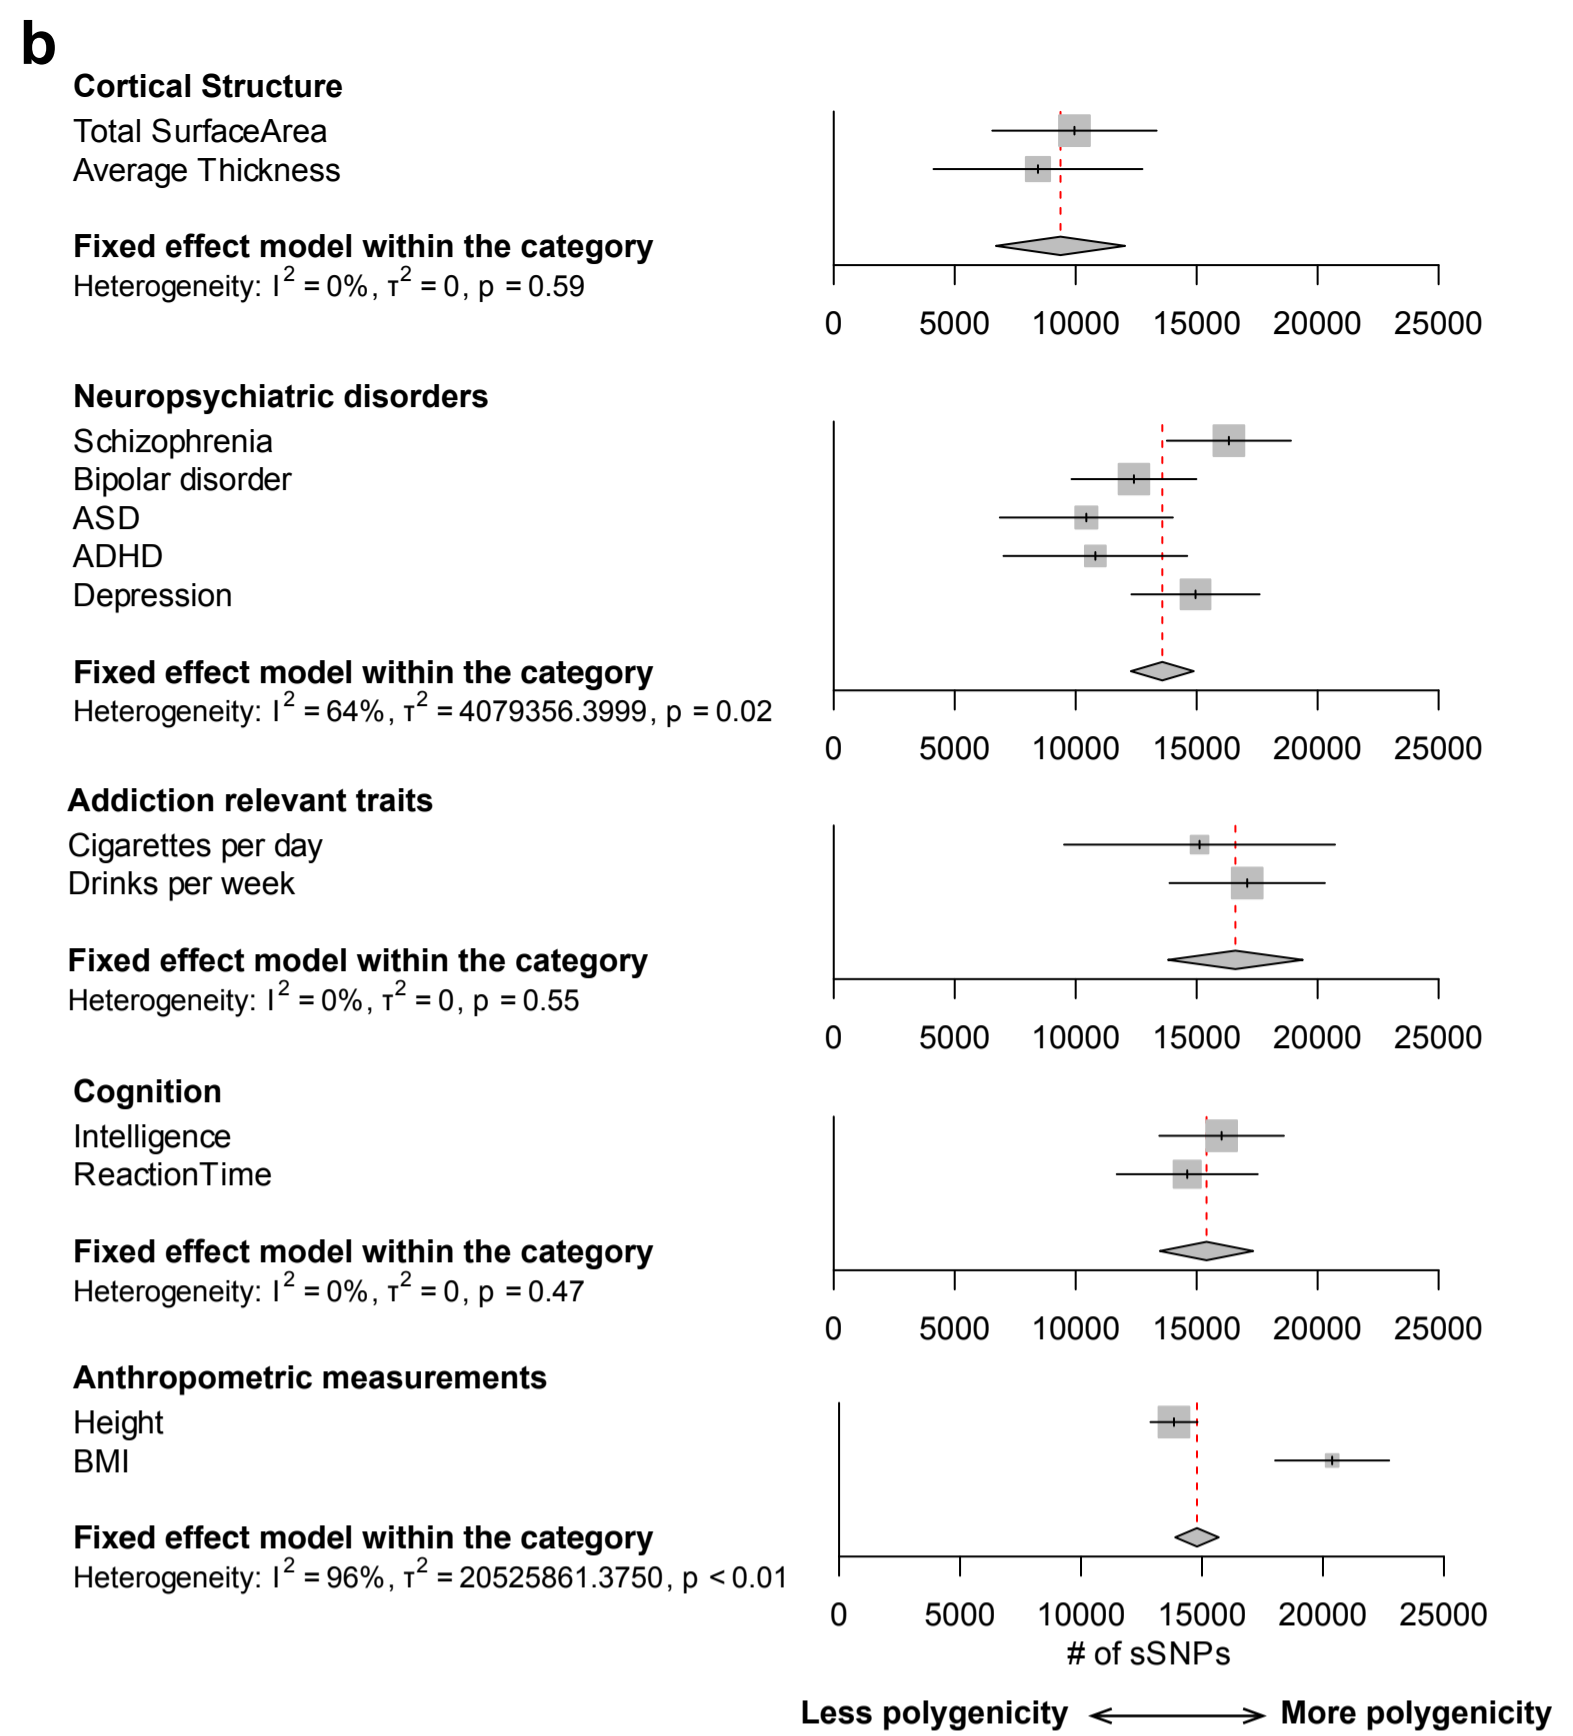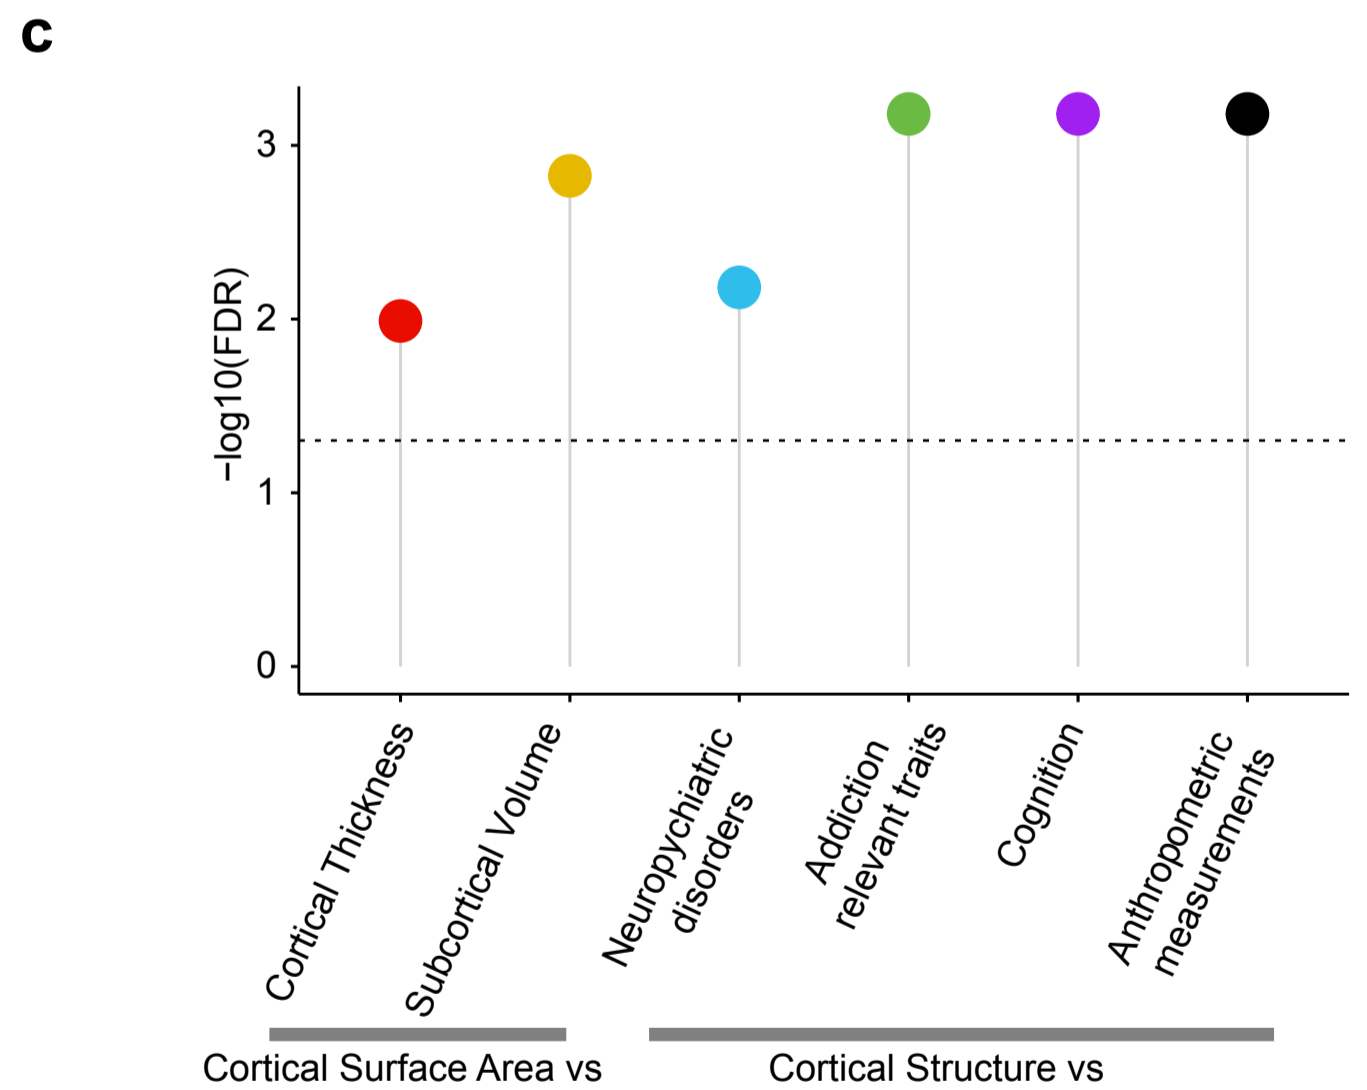

**a**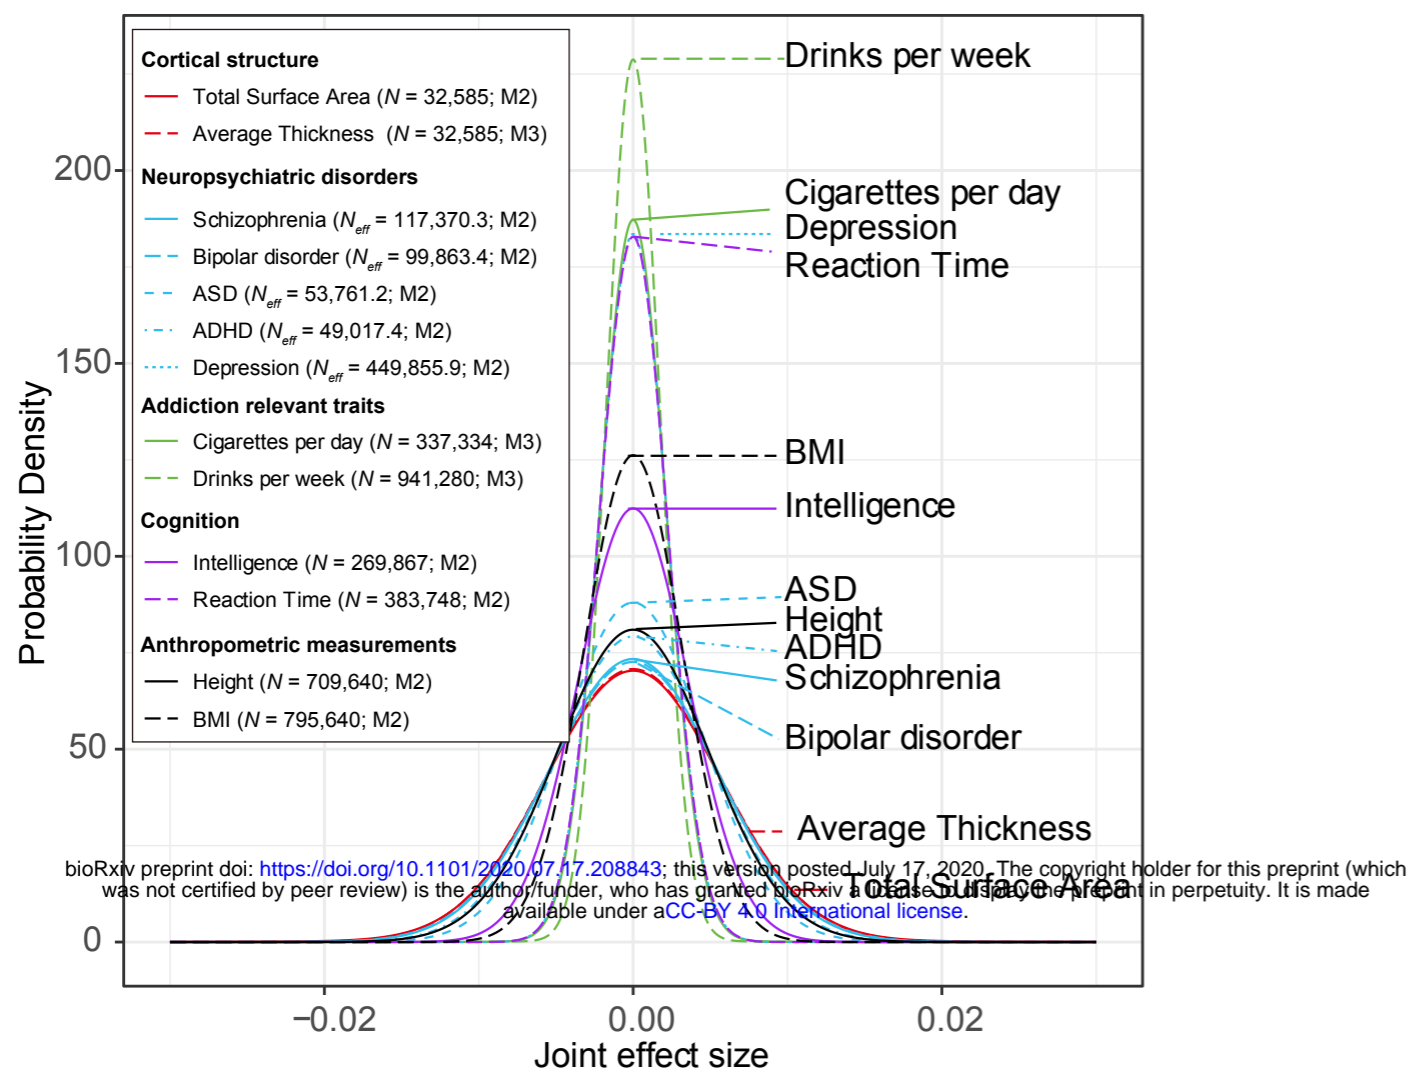**b**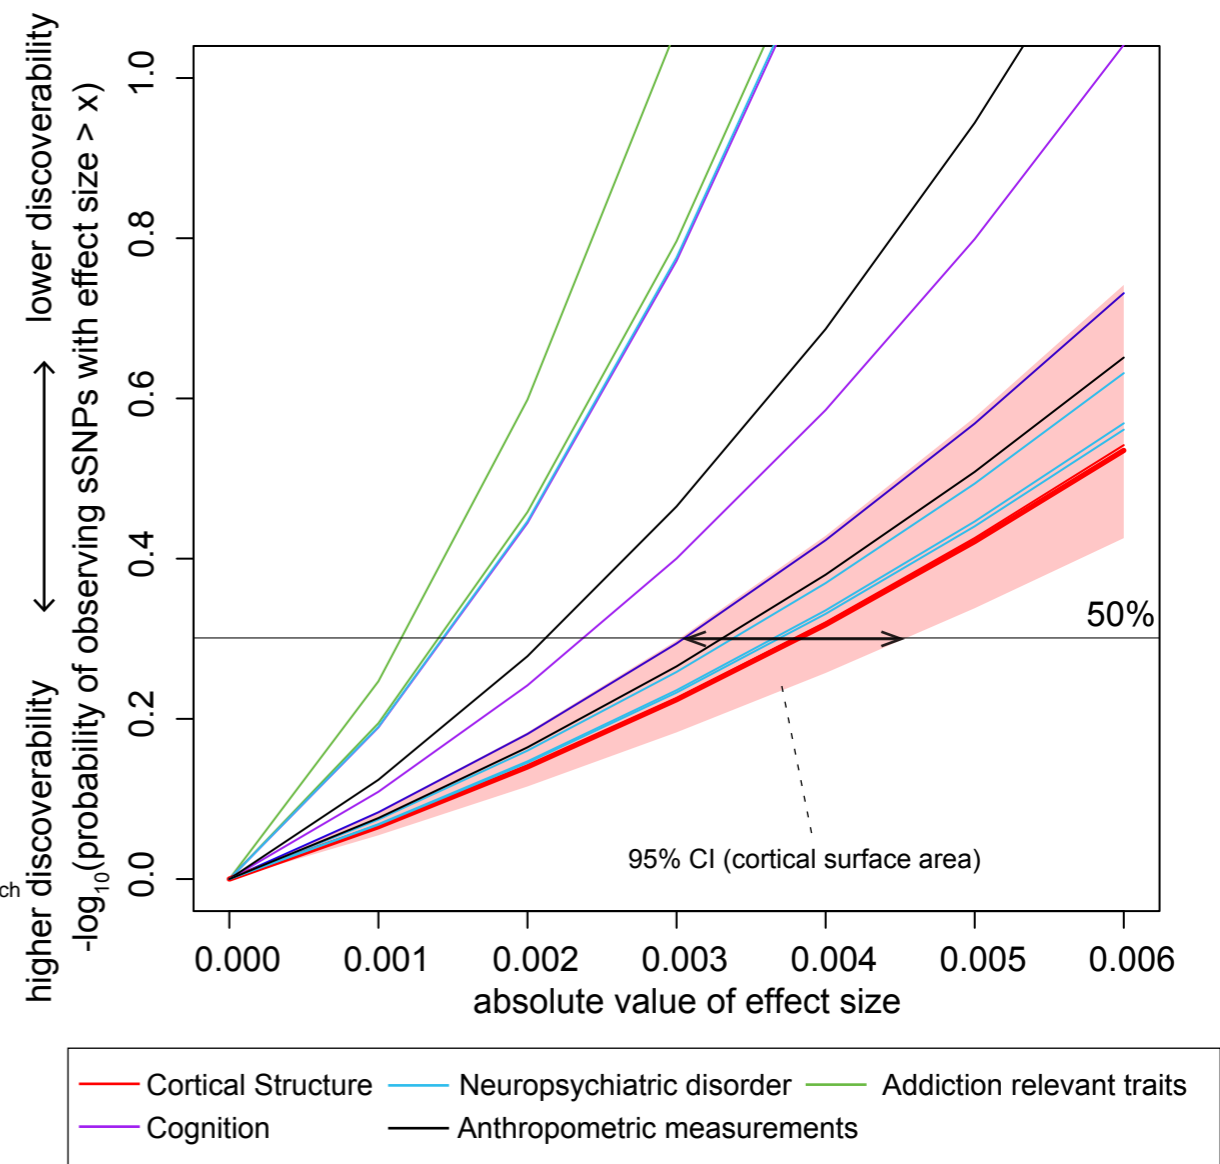**c****Cortical Structure**Total SurfaceArea  
Average Thickness**Fixed effect model**Heterogeneity:  $I^2 = 0\%$ ,  $\tau^2 = 0$ ,  $p = 0.84$ 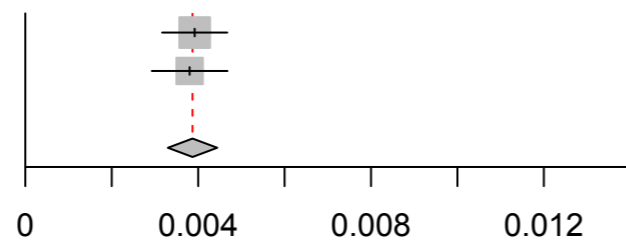**Neuropsychiatric disorders**Schizophrenia  
Bipolar disorder  
ASD  
ADHD  
Depression**Fixed effect model**Heterogeneity:  $I^2 = 99\%$ ,  $\tau^2 < 0.0001$ ,  $p < 0.01$ 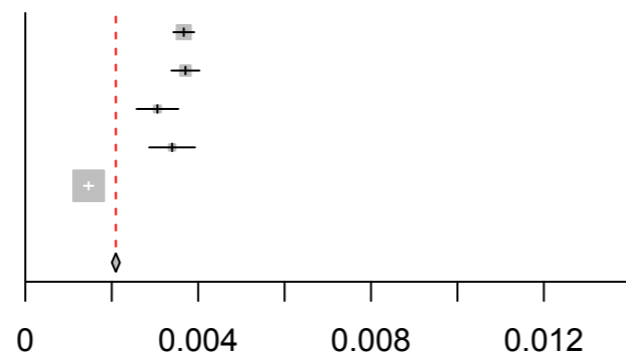**Addiction relevant traits**Cigarettes per day  
Drinks per week**Fixed effect model**Heterogeneity:  $I^2 = 79\%$ ,  $\tau^2 < 0.0001$ ,  $p = 0.03$ 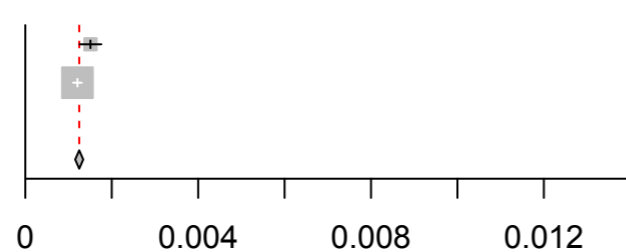**Cognition**Intelligence  
ReactionTime**Fixed effect model**Heterogeneity:  $I^2 = 99\%$ ,  $\tau^2 < 0.0001$ ,  $p < 0.01$ 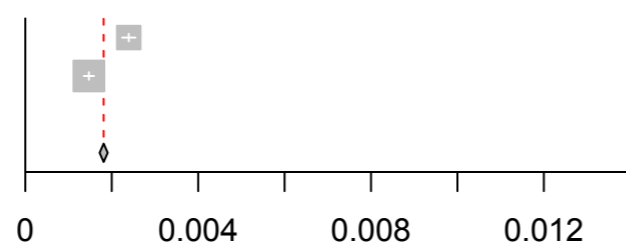**Anthropometric measurements**Height  
BMI**Fixed effect model**Heterogeneity:  $I^2 = 100\%$ ,  $\tau^2 < 0.0001$ ,  $p < 0.01$ 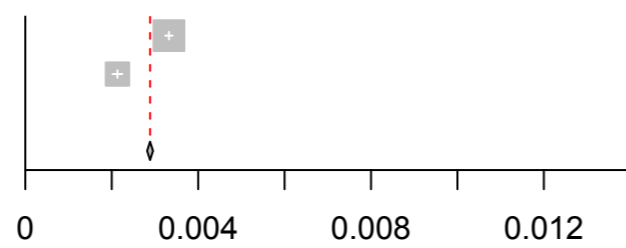

Lower ← discoverability → Higher

**d**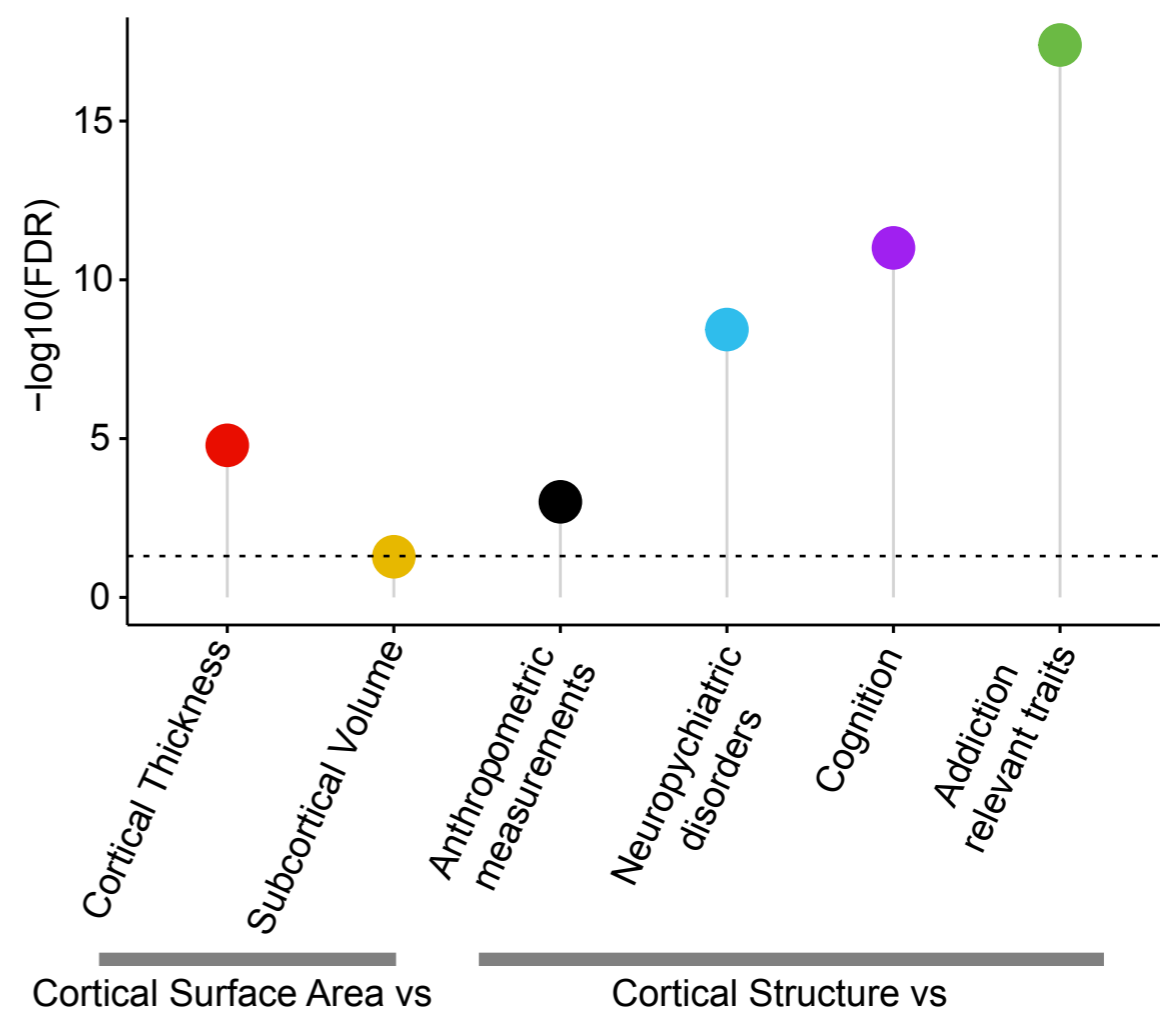

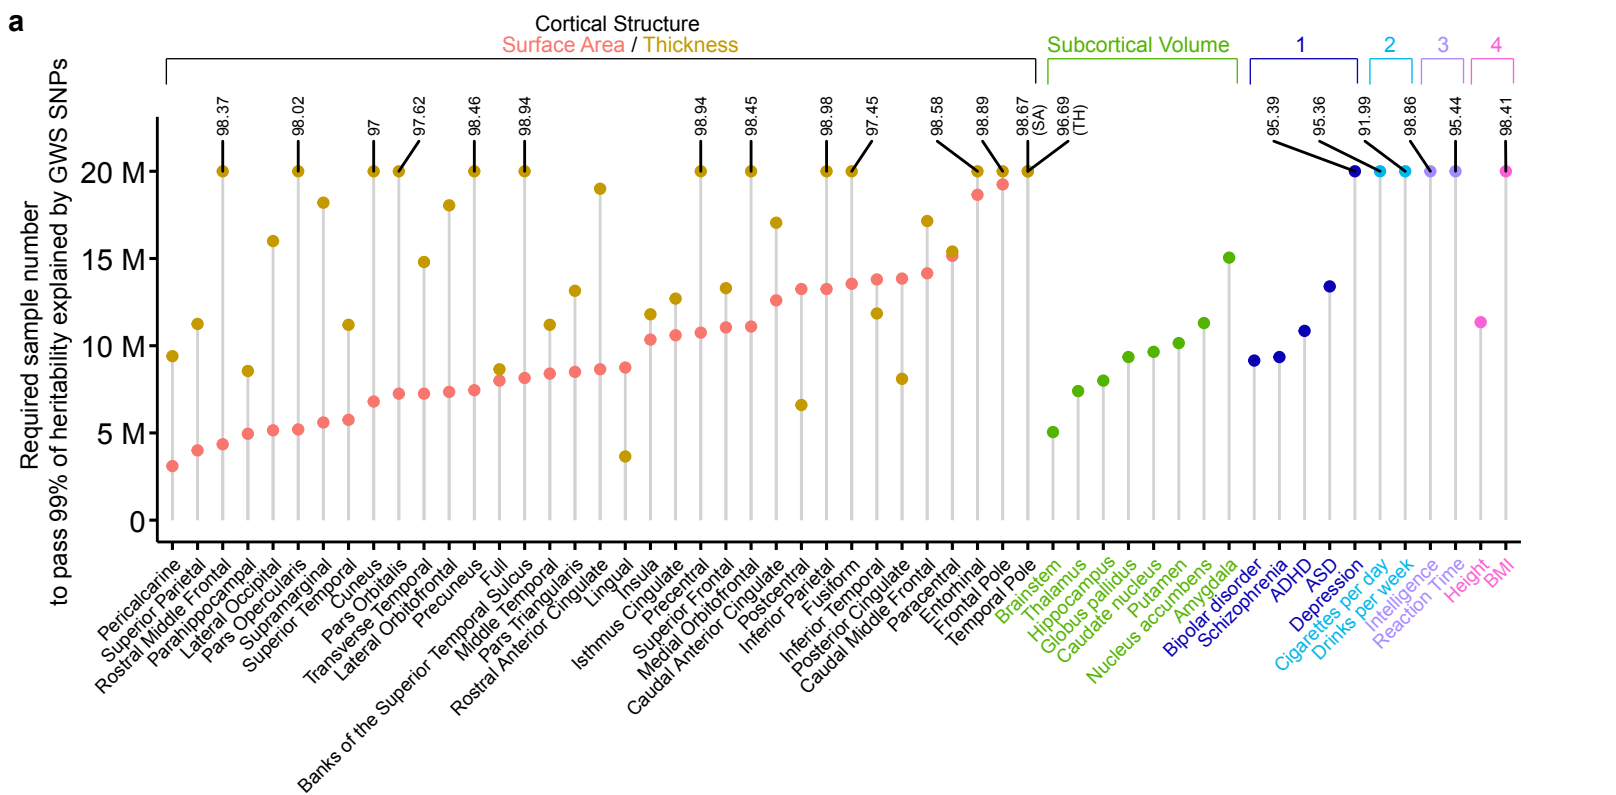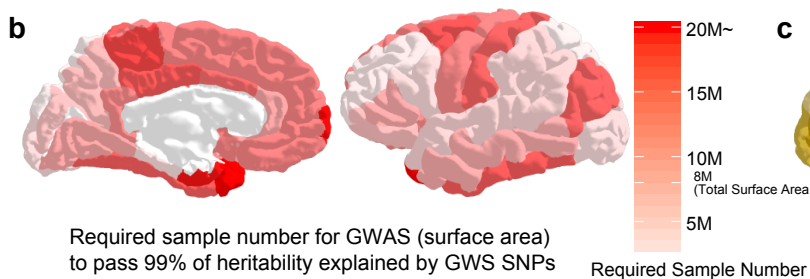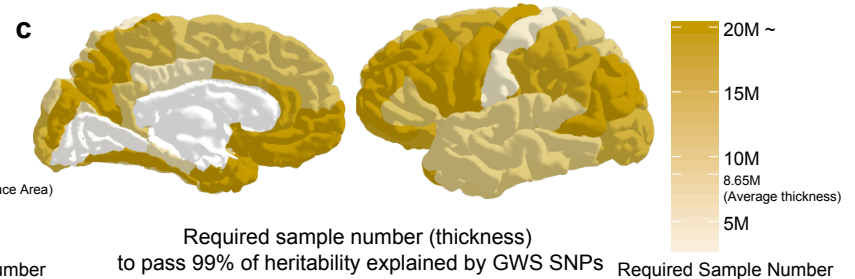

Source: https://www.biorxiv.org/content/10.1101/2020.07.17.208843v1.full.pdf
